# Supplementary material for: A stable 2D luminescent metal–organic framework as a highly sensitive sensor for Fe3+and Cr2O72−/CrO42−in water
Source: Royal Society of Chemistry journal article supplement (doi:10.1039/d3ce00370a), 2023-01-01
Supplement: d3ce00370a1.pdf [file d3ce00370a1.pdf]

# A Stable 2D Luminescent Metal-Organic Framework as Highly Sensitive Sensor for $\text{Fe}^{3+}$ and $\text{Cr}_2\text{O}_7^{2-}/\text{CrO}_4^{2-}$ in Water

Shigang Ning, Bingcheng Yan, Junrong Wu, Sen Chen, Weipeng Chen, Hongju Tian, and

Shaowei Zhang\*

School of Chemistry and Chemical Engineering, Key Laboratory of Theoretical Organic Chemistry and Functional Molecule of the Ministry of Education, Hunan Provincial Key Laboratory of Controllable Preparation and Functional Application of Fine Polymers, Hunan Province College Key Laboratory of Molecular Design and Green Chemistry, Hunan Provincial Key Laboratory of Advanced Materials for New Energy Storage and Conversion, Hunan University of Science and Technology, Xiangtan, Hunan, 411201, China. E-mail: swzhang@hnust.edu.cn

## Supporting Information:

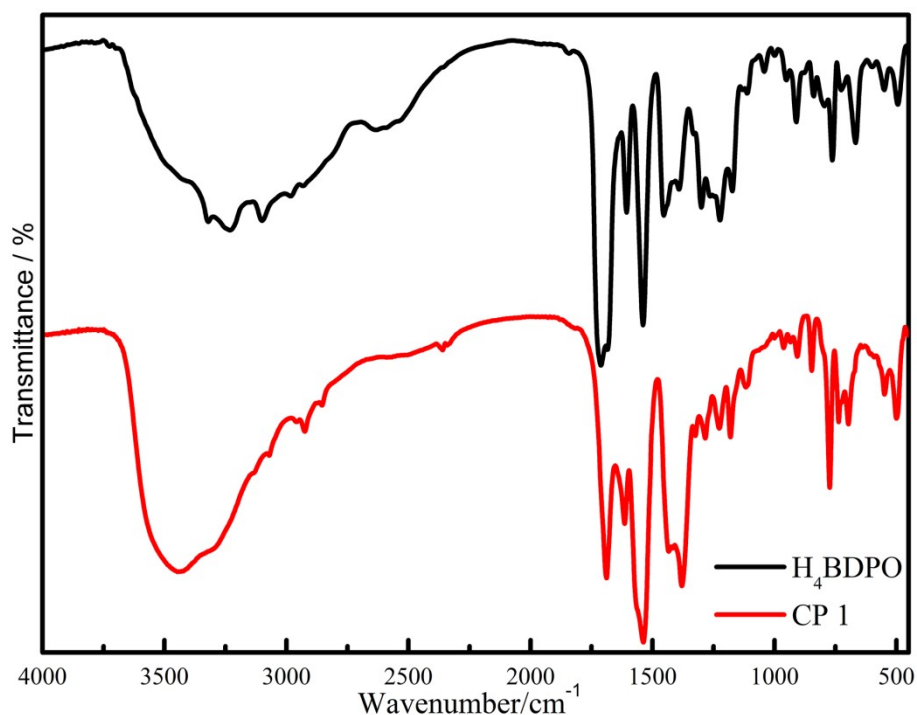

Fig. S1 The IR spectra of **1** and the  $\text{H}_4\text{BDPO}$  ligand at room temperature.

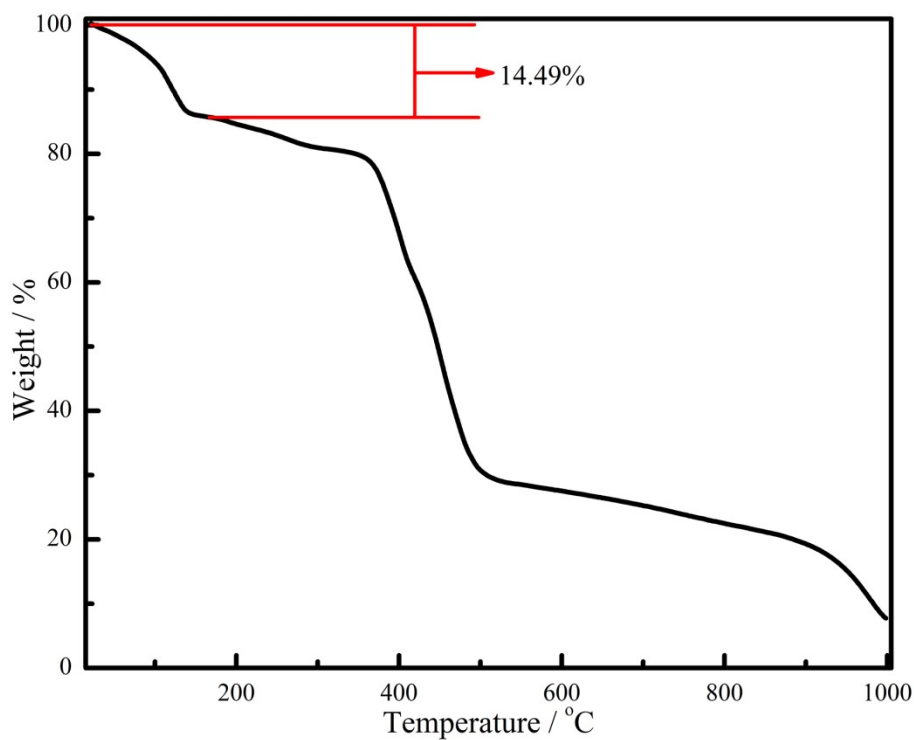

**Fig. S2** The TG curve of **1** on crystalline samples under the  $N_2$  atmosphere in the range of 25–1000 °C.

**Table S1.** *SHAPE* analysis of Cd1 ion in **1**.

| Label   | Shape                                | Symmetry | Distortion |
|---------|--------------------------------------|----------|------------|
| HP-7    | Heptagon                             | $D_{7h}$ | 33.055     |
| HPY-7   | Hexagonal pyramid                    | $C_{6v}$ | 23.061     |
| PBPY-7  | Pentagonal bipyramid                 | $D_{5h}$ | 1.717      |
| COC-7   | Capped octahedron                    | $C_{3v}$ | 7.041      |
| CTPR-7  | Capped trigonal prism                | $C_{2v}$ | 5.191      |
| JPBPY-7 | Johnson pentagonal bipyramid         | $D_{5h}$ | 4.962      |
| JETPY-7 | Johnson elongated triangular pyramid | $C_{3v}$ | 22.146     |

**Table S2.** *SHAPE* analysis of Cd<sup>2+</sup> ion in **1**.

| Label  | Shape                      | Symmetry | Distortion |
|--------|----------------------------|----------|------------|
| HP-6   | Hexagon                    | $D_{6h}$ | 34.672     |
| PPY-6  | Pentagonal pyramid         | $C_{5v}$ | 18.660     |
| OC-6   | Octahedron                 | $O_h$    | 6.946      |
| TPR-6  | Trigonal prism             | $D_{3h}$ | 8.506      |
| JPPY-6 | Johnson pentagonal pyramid | $C_{5v}$ | 22.567     |

**Table S3.** Distance (Å) and angle (°) of hydrogen bonds for **1**.

| D-H      | d(D-H) | d(H $\cdots$ A) | <DHA   | d(D $\cdots$ A) | A                             |
|----------|--------|-----------------|--------|-----------------|-------------------------------|
| O8-H8    | 0.820  | 1.824           | 160.64 | 2.612           | O2 [ x, y+1, z ]              |
| O11-H11A | 0.894  | 2.349           | 149.05 | 3.149           | O5 [ x+1/2, y-1/2, z ]        |
| O11-H11B | 0.892  | 1.913           | 153.86 | 2.742           | O4 [ -x+1/2, -y+1/2, -z+1 ]   |
| O12-H12A | 0.943  | 2.260           | 115.78 | 2.801           | O7 [ x, y-1, z ]              |
| O13-H13B | 0.875  | 1.862           | 151.65 | 2.664           | O1 [ -x+1/2, -y+3/2, -z+1 ]   |
| O14-H14A | 0.846  | 2.095           | 145.52 | 2.833           | O9 [ -x+1/2, y+1/2, -z+3/2 ]  |
| O14-H14B | 0.844  | 1.954           | 159.31 | 2.759           | O15 [ -x+1/2, y+1/2, -z+3/2 ] |
| N1-H1    | 0.860  | 2.178           | 112.92 | 2.635           | O10                           |
| N1-H1    | 0.860  | 2.447           | 166.93 | 3.291           | O16                           |
| N2-H2    | 0.860  | 2.325           | 159.06 | 3.143           | O15                           |
| C6-H6    | 0.930  | 2.362           | 121.66 | 2.958           | O9                            |
| C12-H12  | 0.930  | 2.203           | 123.21 | 2.821           | O10                           |
| C16-H16  | 0.930  | 2.482           | 146.19 | 3.296           | O15                           |

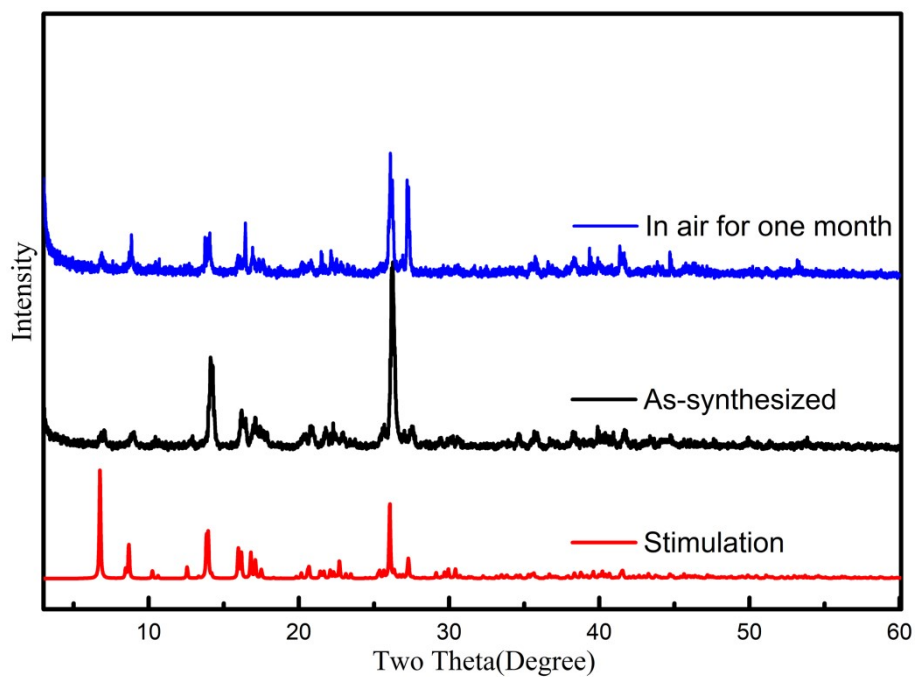

**Fig. S3** PXRD patterns of simulated from the X-ray single structure of **1**, as-synthesized **1**, and **1** samples exposed in air for one month.

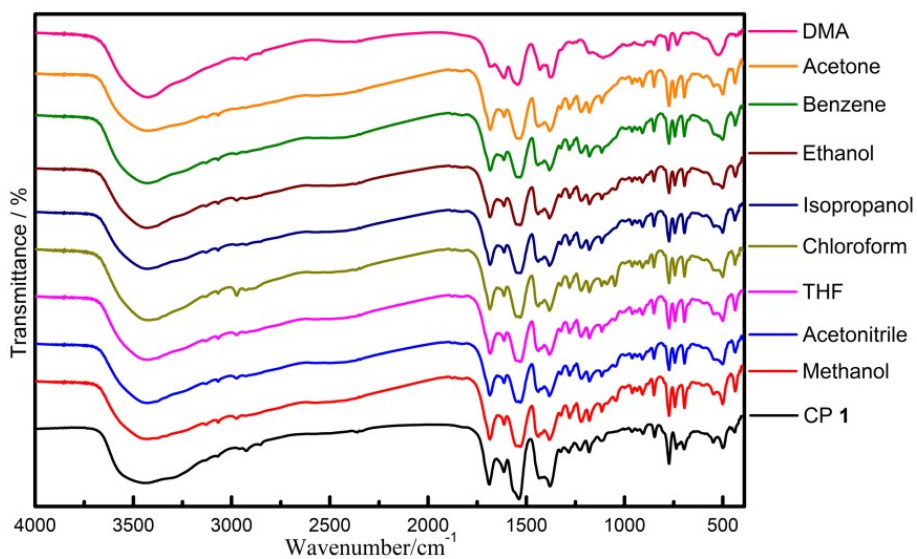

**Fig. S4** IR spectra of **1** and **1** in the solutions of MeOH, CH<sub>3</sub>CN, THF, CHCl<sub>3</sub>, *i*-propanol, EtOH, benzene, acetone, and DMA for one week.

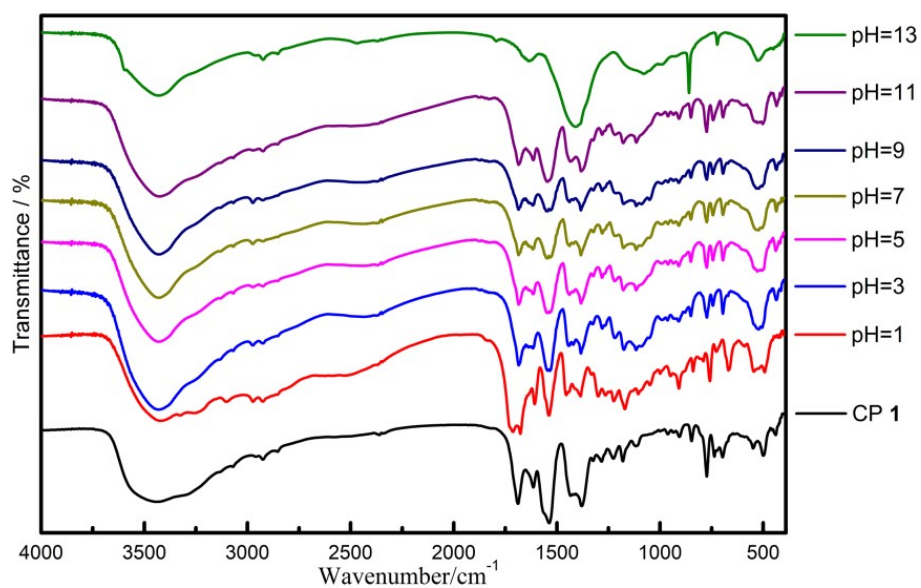

**Fig. S5** IR spectra of **1** and **1** in the aqueous solutions ranging from pH = 1 to 13 for one week.

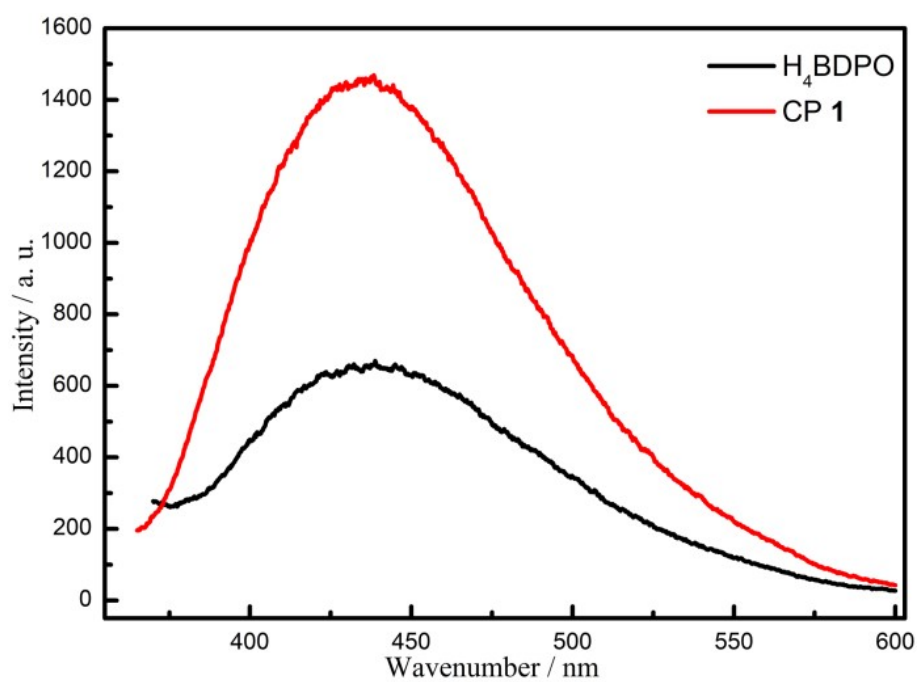

**Fig. S6** The solid-state emission spectra of **1** and H<sub>4</sub>BDPO ligand at room temperature ( $\lambda_{\text{ex}} = 350 \text{ nm}$ ).

**Table S4.** A comparison of selected MOFs-based luminescent sensors for the detection of Fe<sup>3+</sup> ion.

| Coordination Polymers                                                                                                 | Media            | K <sub>sv</sub> / (mol <sup>-1</sup> )                                 | LOD / (mol·L <sup>-1</sup> ) | Ref.      |
|-----------------------------------------------------------------------------------------------------------------------|------------------|------------------------------------------------------------------------|------------------------------|-----------|
| {[Cd <sub>3</sub> (HBDPO) <sub>2</sub> (H <sub>2</sub> O) <sub>7</sub> ]·4H <sub>2</sub> O} <sub>n</sub> ( <b>1</b> ) | H <sub>2</sub> O | 3.798 × 10 <sup>4</sup><br>5.868 × 10 <sup>3</sup> (low concentration) | 4.08 × 10 <sup>-6</sup>      | This work |
| {[Zn(L <sup>1</sup> )(dcdps)]} <sub>n</sub>                                                                           | H <sub>2</sub> O | 7.004 × 10 <sup>3</sup>                                                | 6.21 × 10 <sup>-5</sup>      | S1        |
| {Zn(L <sup>1</sup> )(bdc)} <sub>n</sub>                                                                               | H <sub>2</sub> O | 9.066 × 10 <sup>3</sup>                                                | 4.45 × 10 <sup>-5</sup>      | S1        |
| {[Cd(L <sup>1</sup> )(oba)]·0.5DMF} <sub>n</sub>                                                                      | H <sub>2</sub> O | 4.984 × 10 <sup>3</sup>                                                | 1.152 × 10 <sup>-4</sup>     | S1        |
| {[Cd(L <sup>1</sup> )(bdc)·2H <sub>2</sub> O] 2DMF} <sub>n</sub>                                                      | H <sub>2</sub> O | 6.387 × 10 <sup>3</sup>                                                | 6.36 × 10 <sup>-5</sup>      | S1        |
| {[Co <sub>3</sub> (L <sup>2</sup> ) <sub>3</sub> (phen) <sub>2</sub> ]·4H <sub>2</sub> O} <sub>n</sub>                | H <sub>2</sub> O | 8.10 × 10 <sup>3</sup>                                                 | 9.39 × 10 <sup>-6</sup>      | S2        |
| {[Co <sub>3</sub> (L <sup>2</sup> ) <sub>3</sub> (2,2'-bipy) <sub>2</sub> ]·8H <sub>2</sub> O} <sub>n</sub>           | H <sub>2</sub> O | 6.27 × 10 <sup>3</sup>                                                 | 1.14 × 10 <sup>-5</sup>      | S2        |
| {Cd <sub>2</sub> (L <sup>3</sup> )(2,2'-bipy)} <sub>n</sub>                                                           | H <sub>2</sub> O | 2.99 × 10 <sup>5</sup>                                                 | 2.47 × 10 <sup>-8</sup>      | S3        |
| {Cd <sub>2</sub> (L <sup>3</sup> )(H <sub>2</sub> O) <sub>4</sub> } <sub>n</sub>                                      | H <sub>2</sub> O | 1.23 × 10 <sup>6</sup>                                                 | 1.35 × 10 <sup>-9</sup>      | S3        |
| [Zn <sub>3</sub> (L <sup>4</sup> ) <sub>2</sub> (2,2'-bipy)(μ <sub>3</sub> -OH) <sub>2</sub> ]·3H <sub>2</sub> O      | H <sub>2</sub> O | 2.3 × 10 <sup>4</sup>                                                  | -                            | S4        |
| {Cd(L <sup>5</sup> )(bbibp)} <sub>n</sub>                                                                             | H <sub>2</sub> O | 6.83 × 10 <sup>3</sup>                                                 | 4.39 × 10 <sup>-6</sup>      | S5        |
| {Cd <sub>3</sub> ·L <sup>6</sup> ·(BTB) <sub>2</sub> ·2DMF} <sub>n</sub>                                              | DMF              | 1.01 × 10 <sup>4</sup>                                                 | 1.12 × 10 <sup>-6</sup>      | S6        |

|                                                                                                                                                             |                                 |                     |                        |     |
|-------------------------------------------------------------------------------------------------------------------------------------------------------------|---------------------------------|---------------------|------------------------|-----|
| $\{(\text{Cd}_3\text{O}_2) \cdot \text{L}^6 \cdot \text{btc}\}_n$                                                                                           | DMF                             | $1.31 \times 10^4$  | $2.29 \times 10^{-6}$  | S6  |
| $\{\text{Cd}_3(\text{L}^7)_2(\text{Br-bdc})_6(\text{DMF})_2\}_n$                                                                                            | DMF                             | $5.25 \times 10^4$  | $1.37 \times 10^{-9}$  | S7  |
| $\{\text{Cd}_3(\text{L}^7)_2(\text{NH}_2\text{-bdc})_6(\text{DMF})_2\}_n$                                                                                   | DMF                             | $3.23 \times 10^4$  | $2.23 \times 10^{-9}$  | S7  |
| $\{\text{Cd}_3(\text{L}^7)_2(\text{bdc})_6(\text{DMF})_2\}_n$                                                                                               | DMF                             | $4.04 \times 10^4$  | $1.62 \times 10^{-9}$  | S7  |
| $\{[\text{CoL}^8_2\text{Cl}_2] \cdot 4\text{CH}_3\text{OH}\}_n$                                                                                             | EtOH                            | $1.07 \times 10^4$  | $2.75 \times 10^{-3}$  | S8  |
| $\{[\text{NiL}^8_2\text{Cl}_2] \cdot 4\text{CH}_3\text{OH}\}_n$                                                                                             | EtOH                            | $1.67 \times 10^4$  | $1.2 \times 10^{-4}$   | S8  |
| $\{[\text{CoL}^8_2\text{Br}_2] \cdot 4\text{CH}_3\text{OH}\}_n$                                                                                             | EtOH                            | $3.33 \times 10^4$  | $8.7 \times 10^{-4}$   | S8  |
| $[\text{Zr}_6\text{O}_6(\text{OH})_2(\text{CF}_3\text{COO})_2(\text{C}_{11}\text{H}_5\text{NO}_4)_4(\text{H}_2\text{O})_4]$                                 | H <sub>2</sub> O                | $2.25 \times 10^7$  | $1.7 \times 10^{-9}$   | S9  |
| $[\text{Zn}_2\text{Na}_2(\text{TPHC})(4,4\text{-bipy})(\text{DMF})] \cdot 8\text{H}_2\text{O}$                                                              | DMF                             | $5.77 \times 10^4$  | $6.4 \times 10^{-6}$   | S10 |
| $[\text{CH}_3\text{-dpb}]_2[\text{Mg}_3(1,4\text{-ndc})_4(\mu\text{-H}_2\text{O})_2(\text{CH}_3\text{OH})(\text{H}_2\text{O})] \cdot 1.5\text{H}_2\text{O}$ | CH <sub>2</sub> Cl <sub>2</sub> | $1.6 \times 10^4$   | $4.70 \times 10^{-4}$  | S11 |
| FJI-C8·(Zn)                                                                                                                                                 | H <sub>2</sub> O                | $8.245 \times 10^3$ | $2.33 \times 10^{-5}$  | S12 |
| $[\text{Cd}(5\text{-asba})(\text{bimb})]_n$                                                                                                                 | H <sub>2</sub> O                | $1.78 \times 10^4$  | $1.875 \times 10^{-5}$ | S13 |
| $[\text{Zn}_5(\text{hfipbb})_4(\text{trz})_2(\text{H}_2\text{O})_2]$                                                                                        | H <sub>2</sub> O                | -                   | $2.00 \times 10^{-4}$  | S14 |
| $\{[\text{Cd}(\text{L}^9)(\text{HIP})] \cdot 2\text{H}_2\text{O}\}_n$                                                                                       | DMF                             | $5.57 \times 10^4$  | $2.5 \times 10^{-6}$   | S15 |

|                                                                                                                              |                  |                     |                       |     |
|------------------------------------------------------------------------------------------------------------------------------|------------------|---------------------|-----------------------|-----|
| $\{(\text{Me}_2\text{NH}_2)[\text{Zn}_2(\text{L}^{10})(\text{H}_2\text{O})] \cdot 0.5\text{DMF}\}_n$                         | DMF              | $7.83 \times 10^3$  | $1.45 \times 10^{-8}$ | S16 |
| $\{[\text{Cd}(\text{L}^{11})(\text{BPDC})] \cdot 2\text{H}_2\text{O}\}_n$                                                    | H <sub>2</sub> O | $3.63 \times 10^4$  | $2.21 \times 10^{-6}$ | S17 |
| $\{[\text{Cd}(\text{L}^{11})(\text{SDBA})(\text{H}_2\text{O})] \cdot 0.5\text{H}_2\text{O}\}_n$                              | H <sub>2</sub> O | $3.59 \times 10^4$  | $7.14 \times 10^{-6}$ | S17 |
| $\{[\text{Zn}_3(\text{mtrb})_3(\text{btc})_2] \cdot 3\text{H}_2\text{O}\}$                                                   | H <sub>2</sub> O | $6.50 \times 10^3$  | $1.78 \times 10^{-6}$ | S18 |
| $\{[\text{Zn}(\text{L}^{12})(\text{H}_2\text{O})_2] \cdot \text{H}_2\text{O}\}_n$                                            | H <sub>2</sub> O | $1.09 \times 10^5$  | $5.6 \times 10^{-7}$  | S19 |
| $\{[\text{Cd}(\text{L}^{12})(\text{H}_2\text{O})_2] \cdot 4\text{H}_2\text{O}\}_n$                                           | H <sub>2</sub> O | $7.2 \times 10^4$   | $7.8 \times 10^{-7}$  | S19 |
| $\{[\text{Zn}_2(\text{trz})_2(\text{DBTDC}-\text{O}_2)] \cdot \text{DMAc}\}_n$                                               | H <sub>2</sub> O | $1.0 \times 10^4$   | $4.61 \times 10^{-6}$ | S20 |
| $[\text{Zn}(\text{L}^{13})_2] \cdot 2\text{DMF}$                                                                             | H <sub>2</sub> O | $9.85 \times 10^3$  | $1.91 \times 10^{-6}$ | S21 |
| $[\text{Zn}_2(\text{NO}_3)_2(4,4'\text{-bpy})_2(\text{TBA})]_n$                                                              | H <sub>2</sub> O | $7.48 \times 10^3$  | $7.18 \times 10^{-6}$ | S22 |
| $[\text{Zn}_2(\text{cptpy})(\text{btc})(\text{H}_2\text{O})]_n$                                                              | H <sub>2</sub> O | $5.46 \times 10^3$  | $4.33 \times 10^{-6}$ | S23 |
| $\{[\text{Zn}_3(\text{HL}^{14})2\text{H}_2\text{O}] \cdot 4\text{H}_2\text{O}\}_n$                                           | H <sub>2</sub> O | $5.00 \times 10^3$  | $2.20 \times 10^{-4}$ | S24 |
| $\{[\text{Me}_2\text{NH}_2][\text{Zn}_2(\text{HEDP})(\text{BPDC})_{0.5}(\text{H}_2\text{O})_2] \cdot \text{H}_2\text{O}\}_n$ | H <sub>2</sub> O | $7.31 \times 10^3$  | -                     | S25 |
| $\{[\text{Zn}_3(\text{L}^{15})(\text{OH})(\text{H}_2\text{O})_5] \cdot \text{NMP} \cdot 2\text{H}_2\text{O}\}_n$             | H <sub>2</sub> O | $4.7 \times 10^4$   | $7.7 \times 10^{-5}$  | S26 |
| $\{[\text{Zn}_2(\text{L}^{16})(5\text{-AIP})_2] \cdot 3\text{H}_2\text{O}\}_n$                                               | H <sub>2</sub> O | $4.475 \times 10^3$ | $1.29 \times 10^{-6}$ | S27 |



|                                                                                                      |                      |                        |                        |     |
|------------------------------------------------------------------------------------------------------|----------------------|------------------------|------------------------|-----|
| $\{[\text{Zn}(\text{ATA})(\text{L}^{17})] \cdot 2\text{H}_2\text{O}\}_n$                             | $\text{H}_2\text{O}$ | $5.57 \times 10^{-4}$  | $3.76 \times 10^{-6}$  | S28 |
| $\{[\text{Cd}(\text{ATA})(\text{L}^{17})] \cdot 2\text{H}_2\text{O}\}_n$                             | $\text{H}_2\text{O}$ | $3.838 \times 10^{-3}$ | $1.77 \times 10^{-6}$  | S28 |
| $\{[\text{Cd}_2(\text{bptc})(2,2'\text{-bipy})_2(\text{H}_2\text{O})_2]\}_n$                         | $\text{H}_2\text{O}$ | $8.61 \times 10^3$     | $1.02 \times 10^{-5}$  | S29 |
| $\{[\text{Cd}_2(\text{bptc})(\text{phen})_2] \cdot 4\text{H}_2\text{O}\}_n$                          | $\text{H}_2\text{O}$ | $3.07 \times 10^3$     | $2.17 \times 10^{-5}$  | S29 |
| $\{[\text{Cd}_2(\text{bptc})(4,4'\text{-bipy})(\text{H}_2\text{O})_2] \cdot 4\text{H}_2\text{O}\}_n$ | $\text{H}_2\text{O}$ | $6.21 \times 10^3$     | $2.03 \times 10^{-5}$  | S29 |
| $[\text{Zn}_2(\text{L}^{18})_2(\text{bpe})_2(\text{H}_2\text{O})_2]_n$                               | $\text{H}_2\text{O}$ | $2.395 \times 10^3$    | $2.50 \times 10^{-5}$  | S30 |
| $[\text{Zr}_6\text{O}_4(\text{OH})_8(\text{H}_2\text{O})_4(\text{L}^{19})_2]$                        | $\text{H}_2\text{O}$ | $2.17 \times 10^3$     | $3.79 \times 10^{-9}$  | S31 |
| $[\text{Zr}_6\text{O}_4(\text{OH})_8(\text{H}_2\text{O})_4(\text{L}^{20})_2]$                        | $\text{H}_2\text{O}$ | $1.66 \times 10^4$     | $2.86 \times 10^{-10}$ | S31 |
| $[\text{H}_2\text{N}(\text{CH}_3)_2]_2[\text{Zn}_2\text{L}^{21}(\text{HPO}_3)_2]$                    | $\text{H}_2\text{O}$ | $3.96 \times 10^5$     | $1.16 \times 10^{-7}$  | S32 |
| $\{[\text{Cd}_3(\mu_6\text{-cpta})_2(\text{py})_2] \cdot 5\text{H}_2\text{O}\}_n$                    | $\text{H}_2\text{O}$ | $3.096 \times 10^3$    | $2.1 \times 10^{-7}$   | S33 |
| $\{[\text{Zn}(\text{BIMB})(\text{HL}^{22})] \cdot \text{H}_2\text{O}\}_n$                            | $\text{H}_2\text{O}$ | $2.21 \times 10^4$     | $2.29 \times 10^{-5}$  | S34 |
| $\{[\text{Zn}_2(\text{BIBP})_2(\text{HL}^{22})_2] \cdot 2\text{H}_2\text{O}\}_n$                     | $\text{H}_2\text{O}$ | $1.47 \times 10^4$     | $3.32 \times 10^{-5}$  | S34 |
| $[\text{Zn}(\text{DHT})(\text{BPP})]_n$                                                              | $\text{H}_2\text{O}$ | $1.77 \times 10^4$     | $4.46 \times 10^{-7}$  | S35 |
| $[\text{Zn}_2(\text{OH})(1,4\text{-ndc})_{1.5}(\text{Cz-3,6-bpy})] \cdot 2\text{H}_2\text{O}$        | $\text{H}_2\text{O}$ | $7.176 \times 10^3$    | $4.60 \times 10^{-6}$  | S36 |

|                                                                                                                                          |                       |                      |                        |     |
|------------------------------------------------------------------------------------------------------------------------------------------|-----------------------|----------------------|------------------------|-----|
| [Zn(4-tpvb)(BB) <sub>2</sub> ]                                                                                                           | H <sub>2</sub> O      | 705                  | $7.66 \times 10^{-9}$  | S37 |
| [Zn( $\mu_3$ -L <sup>23</sup> )(H <sub>2</sub> O) <sub>2</sub> ]                                                                         | H <sub>2</sub> O      | $8.88 \times 10^3$   | $1.311 \times 10^{-6}$ | S38 |
| {Ni(1,4-bib) <sub>1.5</sub> (TPA-Cl <sub>2</sub> )·H <sub>2</sub> O} <sub>n</sub>                                                        | H <sub>2</sub> O      | 70                   | $1.0 \times 10^{-7}$   | S39 |
| {[Cd <sub>3</sub> (HL <sup>24</sup> ) <sub>2</sub> (H <sub>2</sub> O) <sub>3</sub> ]·3H <sub>2</sub> O·2CH <sub>3</sub> CN} <sub>n</sub> | H <sub>2</sub> O      | $1.04 \times 10^4$   | $9.06 \times 10^{-5}$  | S40 |
| PCN-604(Al)                                                                                                                              | H <sub>2</sub> O      | $8.53 \times 10^3$   | $6.2 \times 10^{-6}$   | S41 |
| [Zn <sub>2</sub> (3-bpah)(bpta)(H <sub>2</sub> O)]·3H <sub>2</sub> O                                                                     | H <sub>2</sub> O      | $9.8 \times 10^{11}$ | $1.0 \times 10^{-6}$   | S42 |
| [Zn <sub>4</sub> (bptc) <sub>2</sub> (NMP) <sub>3</sub> (DMF)(H <sub>2</sub> O) <sub>2</sub> ] <sub>n</sub>                              | EtOH/H <sub>2</sub> O | $4.12 \times 10^3$   | -                      | S43 |
| [Cd <sub>4</sub> (bptc) <sub>2</sub> (NMP) <sub>3</sub> (DMF) <sub>2</sub> (H <sub>2</sub> O)] <sub>n</sub>                              | EtOH/H <sub>2</sub> O | $6.57 \times 10^3$   | -                      | S43 |
| {[Zn <sub>2</sub> (bptc)(DMA)(H <sub>2</sub> O) <sub>2</sub> ]·(DMA) <sub>2</sub> ·H <sub>2</sub> O} <sub>n</sub>                        | EtOH/H <sub>2</sub> O | $3.76 \times 10^3$   | -                      | S43 |
| [Cd(Hcip)(bpea) <sub>0.5</sub> (H <sub>2</sub> O)] <sub>n</sub>                                                                          | DMF                   | $4.10 \times 10^4$   | $3.24 \times 10^{-6}$  | S44 |
| [Zn <sub>1.5</sub> (dttz)(Hdpa)] <sub>n</sub>                                                                                            | DMF                   | $1.79 \times 10^4$   | $1.45 \times 10^{-6}$  | S45 |
| [Ag( $\mu$ -aca)( $\mu_4$ -bztpy) <sub>1/2</sub> ]                                                                                       | H <sub>2</sub> O      | $1.25 \times 10^4$   | $6.85 \times 10^{-6}$  | S46 |
| [Ag( $\mu$ -bza)( $\mu$ -bpa)]                                                                                                           | H <sub>2</sub> O      | $3.93 \times 10^3$   | $5.17 \times 10^{-5}$  | S46 |

---

**Table S5.** A comparison of selected MOFs-based luminescent sensors for the detection of  $\text{Cr}_2\text{O}_7^{2-}$  ion.

| Coordination Polymers                                                                             | Media                | $K_{sv} / (\text{mol}^{-1})$                                   | LOD / $(\text{mol}\cdot\text{L}^{-1})$ | Ref.      |
|---------------------------------------------------------------------------------------------------|----------------------|----------------------------------------------------------------|----------------------------------------|-----------|
| $\{[\text{Cd}_3(\text{HBDPO})_2(\text{H}_2\text{O})_7]\cdot 4\text{H}_2\text{O}\}_n$ ( <b>1</b> ) | $\text{H}_2\text{O}$ | $2.691 \times 10^4$<br>$5.635 \times 10^3$ (low concentration) | $4.26 \times 10^{-6}$                  | This work |
| $\{\text{Zn}(\text{L}^1)(\text{dcdps})\}_n$                                                       | $\text{H}_2\text{O}$ | $4.456 \times 10^4$                                            | $1.03 \times 10^{-5}$                  | S1        |
| $\{\text{Zn}(\text{L}^1)(\text{bdc})\}_n$                                                         | $\text{H}_2\text{O}$ | $7.716 \times 10^4$                                            | $5.55 \times 10^{-6}$                  | S1        |
| $\{[\text{Cd}(\text{L}^1)(\text{oba})]\cdot 0.5\text{DMF}\}_n$                                    | $\text{H}_2\text{O}$ | $6.145 \times 10^4$                                            | $7.36 \times 10^{-6}$                  | S1        |
| $\{[\text{Cd}(\text{L}^1)(\text{bdc})\cdot 2\text{H}_2\text{O}]\cdot 2\text{DMF}\}_n$             | $\text{H}_2\text{O}$ | $4.248 \times 10^4$                                            | $1.05 \times 10^{-5}$                  | S1        |
| $\{[\text{Co}_3(\text{L}^2)_3(\text{phen})_2]\cdot 4\text{H}_2\text{O}\}_n$                       | $\text{H}_2\text{O}$ | $5.62 \times 10^3$                                             | $1.66 \times 10^{-5}$                  | S2        |
| $\{[\text{Co}_3(\text{L}^2)_3(2,2'\text{-bipy})_2]\cdot 8\text{H}_2\text{O}\}_n$                  | $\text{H}_2\text{O}$ | $4.13 \times 10^3$                                             | $2.12 \times 10^{-5}$                  | S2        |
| $\{\text{Cd}_3\cdot \text{L}^6\cdot (\text{BTB})_2\cdot 2\text{DMF}\}_n$                          | DMF                  | $2.06 \times 10^4$                                             | $1.4 \times 10^{-6}$                   | S6        |
| $\{(\text{Cd}_3\text{O}_2)\cdot \text{L}^6\cdot \text{btc}\}_n$                                   | DMF                  | $2.44 \times 10^4$                                             | $1.2 \times 10^{-6}$                   | S6        |
| $\{[\text{Cd}(\text{L}^1)(\text{BPDC})]\cdot 2\text{H}_2\text{O}\}_n$                             | $\text{H}_2\text{O}$ | $6.4 \times 10^3$                                              | $3.76 \times 10^{-5}$                  | S17       |
| $\{[\text{Cd}(\text{L}^1)(\text{SDBA})(\text{H}_2\text{O})]\cdot 0.5\text{H}_2\text{O}\}_n$       | $\text{H}_2\text{O}$ | $4.97 \times 10^3$                                             | $4.86 \times 10^{-5}$                  | S17       |
| $\{[\text{Zn}_3(\text{mtrb})_3(\text{btc})_2]\cdot 3\text{H}_2\text{O}\}$                         | $\text{H}_2\text{O}$ | $4.62 \times 10^3$                                             | $2.83 \times 10^{-6}$                  | S18       |

|                                                                                                                              |                      |                        |                       |     |
|------------------------------------------------------------------------------------------------------------------------------|----------------------|------------------------|-----------------------|-----|
| $\{[\text{Zn}(\text{L}^{12})(\text{H}_2\text{O})_2] \cdot \text{H}_2\text{O}\}_n$                                            | $\text{H}_2\text{O}$ | $9.1 \times 10^4$      | $7.3 \times 10^{-6}$  | S19 |
| $\{[\text{Cd}(\text{L}^{12})(\text{H}_2\text{O})_2] \cdot 4\text{H}_2\text{O}\}_n$                                           | $\text{H}_2\text{O}$ | $3.58 \times 10^4$     | $8.2 \times 10^{-6}$  | S19 |
| $\{[\text{Zn}_2(\text{trz})_2(\text{DBTDC-O}_2)] \cdot \text{DMAc}\}_n$                                                      | $\text{H}_2\text{O}$ | $1.24 \times 10^4$     | $2.55 \times 10^{-6}$ | S20 |
| $[\text{Zn}(\text{L}^{13})_2] \cdot 2\text{DMF}$                                                                             | $\text{H}_2\text{O}$ | $1.25 \times 10^4$     | $1.45 \times 10^{-6}$ | S21 |
| $\{[\text{Me}_2\text{NH}_2][\text{Zn}_2(\text{HEDP})(\text{BPDC})_{0.5}(\text{H}_2\text{O})_2] \cdot \text{H}_2\text{O}\}_n$ | $\text{H}_2\text{O}$ | $2.09 \times 10^5$     | -                     | S25 |
| $\{[\text{Zn}_3(\text{L}^{15})(\text{OH})(\text{H}_2\text{O})_5] \cdot \text{NMP} \cdot 2\text{H}_2\text{O}\}_n$             | $\text{H}_2\text{O}$ | $6.6 \times 10^4$      | $6.05 \times 10^{-5}$ | S26 |
| $\{[\text{Zn}(\text{ATA})(\text{L}^{17})] \cdot 2\text{H}_2\text{O}\}_n$                                                     | $\text{H}_2\text{O}$ | $2.623 \times 10^{-3}$ | $4.3 \times 10^{-7}$  | S28 |
| $\{[\text{Cd}(\text{ATA})(\text{L}^{17})] \cdot 2\text{H}_2\text{O}\}_n$                                                     | $\text{H}_2\text{O}$ | $3.119 \times 10^{-3}$ | $1.9 \times 10^{-7}$  | S28 |
| $\{[\text{Cd}_2(\text{bptc})(2,2'\text{-bipy})_2(\text{H}_2\text{O})_2]\}_n$                                                 | $\text{H}_2\text{O}$ | $1.17 \times 10^4$     | $7.38 \times 10^{-6}$ | S29 |
| $\{[\text{Cd}_2(\text{bptc})(\text{phen})_2] \cdot 4\text{H}_2\text{O}\}_n$                                                  | $\text{H}_2\text{O}$ | $2.09 \times 10^3$     | $5.89 \times 10^{-5}$ | S29 |
| $\{[\text{Cd}_2(\text{bptc})(4,4'\text{-bipy})(\text{H}_2\text{O})_2] \cdot 4\text{H}_2\text{O}\}_n$                         | $\text{H}_2\text{O}$ | $9.34 \times 10^3$     | $1.36 \times 10^{-5}$ | S29 |
| $[\text{H}_2\text{N}(\text{CH}_3)_2]_2[\text{Zn}_2\text{L}^{21}(\text{HPO}_3)_2]$                                            | $\text{H}_2\text{O}$ | $4.44 \times 10^4$     | $1.09 \times 10^{-6}$ | S32 |
| $\{[\text{Zn}(\text{BIMB})(\text{HL}^{22})] \cdot \text{H}_2\text{O}\}_n$                                                    | $\text{H}_2\text{O}$ | $2.08 \times 10^4$     | $2.51 \times 10^{-5}$ | S34 |
| $\{[\text{Zn}_2(\text{BIBP})_2(\text{HL}^{22})_2] \cdot 2\text{H}_2\text{O}\}_n$                                             | $\text{H}_2\text{O}$ | $1.34 \times 10^4$     | $3.34 \times 10^{-5}$ | S34 |

|                                                                                                                      |                      |                      |                        |     |
|----------------------------------------------------------------------------------------------------------------------|----------------------|----------------------|------------------------|-----|
| $[\text{Zn}_2(\text{OH})(1,4\text{-ndc})_{1.5}(\text{Cz-3,6-bpy})] \cdot 2\text{H}_2\text{O}$                        | $\text{H}_2\text{O}$ | $1.17 \times 10^4$   | $1.77 \times 10^{-6}$  | S36 |
| $\{[\text{Cd}_3(\text{HL}^{24})_2(\text{H}_2\text{O})_3] \cdot 3\text{H}_2\text{O} \cdot 2\text{CH}_3\text{CN}\}_n$  | $\text{H}_2\text{O}$ | $6.99 \times 10^3$   | $1.17 \times 10^{-4}$  | S40 |
| $[\text{Zn}_2(3\text{-bpah})(\text{bpta})(\text{H}_2\text{O})] \cdot 3\text{H}_2\text{O}$                            | $\text{H}_2\text{O}$ | $9.3 \times 10^6$    | $10^{-15}$             | S42 |
| $[\text{Ag}(\mu\text{-aca})(\mu_4\text{-bztpy})_{1/2}]$                                                              | $\text{H}_2\text{O}$ | $7.33 \times 10^3$   | $3.68 \times 10^{-5}$  | S46 |
| $[\text{Ag}(\mu\text{-bza})(\mu\text{-bpa})]$                                                                        | $\text{H}_2\text{O}$ | $4.37 \times 10^4$   | $1.03 \times 10^{-5}$  | S46 |
| $\{\text{Co}(\text{TBTA})(\text{L}^{25})_2\}_n$                                                                      | $\text{H}_2\text{O}$ | $1.6286 \times 10^4$ | $9.0 \times 10^{-4}$   | S47 |
| $\{\text{Co}(\text{TBTA})(\text{L}^{26})_2\}_n$                                                                      | $\text{H}_2\text{O}$ | $1.2435 \times 10^4$ | $1.51 \times 10^{-3}$  | S47 |
| $\{\text{Co}(\text{TBTA})(\text{L}^{27})_{1.5}\}_n$                                                                  | $\text{H}_2\text{O}$ | $1.5997 \times 10^4$ | $6.7 \times 10^{-4}$   | S47 |
| USTS-7                                                                                                               | $\text{H}_2\text{O}$ | $1.31 \times 10^4$   | $2.2 \times 10^{-6}$   | S48 |
| $[\text{Zn}(\text{tpbpc})_2] \cdot \text{solvent}$                                                                   | $\text{H}_2\text{O}$ | $1.13 \times 10^4$   | $6.76 \times 10^{-7}$  | S49 |
| $\{[\text{Co}_{1.5}(\text{TBIP})_{1.5}(\text{L}^{28})] \cdot 0.5\text{H}_2\text{O}\}_n$                              | $\text{H}_2\text{O}$ | $2.09 \times 10^4$   | $9.9 \times 10^{-5}$   | S50 |
| $\{[\text{Cd}_{10}(\text{DDB})_4(\text{bpz})_8(\text{DMA})(\text{H}_2\text{O})_{8.2}] \cdot 2\text{H}_2\text{O}\}_n$ | $\text{H}_2\text{O}$ | $2.27 \times 10^4$   | $3.77 \times 10^{-7}$  | S51 |
| $[\text{Zn}(\text{IPA})(\text{L}^{29})]_n$                                                                           | $\text{H}_2\text{O}$ | $1.37 \times 10^3$   | $1.202 \times 10^{-5}$ | S52 |
| $[\text{Cd}(\text{IPA})(\text{L}^{29})]_n$                                                                           | $\text{H}_2\text{O}$ | $2.91 \times 10^3$   | $2.26 \times 10^{-6}$  | S52 |

|                                                                                                                 |                      |                     |                       |     |
|-----------------------------------------------------------------------------------------------------------------|----------------------|---------------------|-----------------------|-----|
| $\{[\text{Cd}_2\text{L}^{30}(\text{H}_2\text{O})_4] \cdot \text{H}_2\text{O}\}_n$                               | $\text{H}_2\text{O}$ | $1.25 \times 10^4$  | $3.7 \times 10^{-6}$  | S53 |
| $\{[\text{Zn}_2\text{L}^{30}(\text{H}_2\text{O})_4] \cdot \text{H}_2\text{O}\}_n$                               | $\text{H}_2\text{O}$ | $1.77 \times 10^4$  | $2.6 \times 10^{-6}$  | S53 |
| $[\text{Cd}(4\text{-tkpvb})(5\text{-tert-BIPA})]_n$                                                             | $\text{H}_2\text{O}$ | $2.50 \times 10^4$  | $1.2 \times 10^{-7}$  | S54 |
| $[\text{Zn}(\text{L}^{31})(\text{BBI}) \cdot (\text{H}_2\text{O})_2]_n$                                         | $\text{H}_2\text{O}$ | $1.17 \times 10^4$  | -                     | S55 |
| $[\text{Cd}(\text{L}^{31})(\text{TPOM})_{0.75}] \cdot \text{xS}$                                                | $\text{H}_2\text{O}$ | $1.345 \times 10^4$ | -                     | S55 |
| $\{[\text{Zn}_2(\text{TPOM})(\text{NH}_2\text{-bdc})_2] \cdot 4\text{H}_2\text{O}\}_n$                          | DMF                  | $7.59 \times 10^3$  | $3.9 \times 10^{-6}$  | S56 |
| $[\text{Zn}(\text{btz})]_n$                                                                                     | $\text{H}_2\text{O}$ | $4.23 \times 10^3$  | $2.0 \times 10^{-6}$  | S57 |
| $\{[\text{Zn}_2(\text{tz})\text{H}_2\text{O}]_n\}$                                                              | $\text{H}_2\text{O}$ | $2.19 \times 10^3$  | $1.00 \times 10^{-5}$ | S57 |
| $[\text{Cd}_3(\text{cpota})_2(\text{phen})_3]_n \cdot 5\text{H}_2\text{O}$                                      | $\text{H}_2\text{O}$ | $1.21 \times 10^4$  | $3.70 \times 10^{-7}$ | S58 |
| $[\text{Zn}(\text{NH}_2\text{-bdc})(4,4'\text{-bipy})]_n$                                                       | $\text{H}_2\text{O}$ | $7.62 \times 10^3$  | $1.30 \times 10^{-6}$ | S59 |
| $\{[\text{Cd}_2(\text{HDDB})(\text{bib})_{1.5}(\text{H}_2\text{O})] \cdot 2.5\text{H}_2\text{O}\}_n$            | $\text{H}_2\text{O}$ | $2.7 \times 10^4$   | -                     | S60 |
| $[\text{Cd}_2(\text{HDDB})(\text{m-bimb})] \cdot \text{H}_2\text{O}\}_n$                                        | $\text{H}_2\text{O}$ | $1.8 \times 10^4$   | -                     | S60 |
| $\{[\text{Cd}_2(\text{DDB})(\text{p-bimb})] \cdot 2.5\text{H}_2\text{O} \cdot 0.5(\text{p-H}_2\text{bimb})\}_n$ | $\text{H}_2\text{O}$ | $2.8 \times 10^4$   | -                     | S60 |
| $[\text{Cd}_2(\text{dpa})_2(\text{cda})\text{Cl}_2]_n$                                                          | $\text{H}_2\text{O}$ | -                   | $4.0 \times 10^{-7}$  | S61 |

[Cd(dpa)<sub>2</sub>(cda)]<sub>n</sub>

H<sub>2</sub>O

-

$2.0 \times 10^{-7}$

S61

---

**Table S6.** A comparison of selected MOFs-based luminescent sensors for the detection of CrO<sub>4</sub><sup>2-</sup> ion.

| Coordination Polymers                                                                                         | Media            | K <sub>sv</sub> / (mol <sup>-1</sup> )                                 | LOD / (mol·L <sup>-1</sup> ) | Ref.      |
|---------------------------------------------------------------------------------------------------------------|------------------|------------------------------------------------------------------------|------------------------------|-----------|
| {[Cd <sub>3</sub> (HBDPO) <sub>2</sub> (H <sub>2</sub> O) <sub>7</sub> ]·4H <sub>2</sub> O} <sub>n</sub> (1)  | H <sub>2</sub> O | 1.614 × 10 <sup>3</sup><br>1.400 × 10 <sup>3</sup> (low concentration) | 1.71 × 10 <sup>-5</sup>      | This work |
| {Cd <sub>2</sub> (L <sup>3</sup> )(2,2'-bipy)} <sub>n</sub>                                                   | H <sub>2</sub> O | 4.51 × 10 <sup>5</sup>                                                 | 1.12 × 10 <sup>-8</sup>      | S3        |
| {Cd <sub>2</sub> (L <sup>3</sup> )(H <sub>2</sub> O) <sub>4</sub> } <sub>n</sub>                              | H <sub>2</sub> O | 3.61 × 10 <sup>5</sup>                                                 | 2.23 × 10 <sup>-8</sup>      | S3        |
| {[Zn <sub>3</sub> (mtrb) <sub>3</sub> (btc) <sub>2</sub> ]·3H <sub>2</sub> O}                                 | H <sub>2</sub> O | 2.77 × 10 <sup>3</sup>                                                 | 4.52 × 10 <sup>-6</sup>      | S18       |
| {[Zn(L <sup>12</sup> )(H <sub>2</sub> O) <sub>2</sub> ]·H <sub>2</sub> O} <sub>n</sub>                        | H <sub>2</sub> O | 4.1 × 10 <sup>4</sup>                                                  | 5.7 × 10 <sup>-6</sup>       | S19       |
| {[Cd(L <sup>12</sup> )(H <sub>2</sub> O) <sub>2</sub> ]·4H <sub>2</sub> O} <sub>n</sub>                       | H <sub>2</sub> O | 3.03 × 10 <sup>4</sup>                                                 | 6.8 × 10 <sup>-6</sup>       | S19       |
| [Zn(L <sup>13</sup> ) <sub>2</sub> ]·2DMF                                                                     | H <sub>2</sub> O | 1.34 × 10 <sup>4</sup>                                                 | 1.14 × 10 <sup>-6</sup>      | S21       |
| {[Zn <sub>3</sub> (L <sup>15</sup> )(OH)(H <sub>2</sub> O) <sub>5</sub> ]·NMP·2H <sub>2</sub> O} <sub>n</sub> | H <sub>2</sub> O | 1.30 × 10 <sup>4</sup>                                                 | 4.29 × 10 <sup>-4</sup>      | S26       |
| {[Zn(ATA)(L <sup>17</sup> )]·2H <sub>2</sub> O} <sub>n</sub>                                                  | H <sub>2</sub> O | 1.485 × 10 <sup>-3</sup>                                               | 2.5 × 10 <sup>-7</sup>       | S28       |
| {[Cd(ATA)(L <sup>17</sup> )]·2H <sub>2</sub> O} <sub>n</sub>                                                  | H <sub>2</sub> O | 9.7 × 10 <sup>-4</sup>                                                 | 1.8 × 10 <sup>-7</sup>       | S28       |
| {[Cd <sub>2</sub> (bptc)(2,2'-bipy) <sub>2</sub> (H <sub>2</sub> O) <sub>2</sub> ]} <sub>n</sub>              | H <sub>2</sub> O | 7.95 × 10 <sup>3</sup>                                                 | 7.79 × 10 <sup>-6</sup>      | S29       |
| {[Cd <sub>2</sub> (bptc)(phen) <sub>2</sub> ]·4H <sub>2</sub> O} <sub>n</sub>                                 | H <sub>2</sub> O | 1.09 × 10 <sup>3</sup>                                                 | 1.06 × 10 <sup>-4</sup>      | S29       |



|                                                                                                                      |                      |                    |                        |     |
|----------------------------------------------------------------------------------------------------------------------|----------------------|--------------------|------------------------|-----|
| $\{[\text{Cd}_2(\text{bptc})(4,4'\text{-bipy})(\text{H}_2\text{O})_2] \cdot 4\text{H}_2\text{O}\}_n$                 | $\text{H}_2\text{O}$ | $5.38 \times 10^3$ | $1.60 \times 10^{-5}$  | S29 |
| $\{[\text{Zn}(\text{BIMB})(\text{HL}^{22})] \cdot \text{H}_2\text{O}\}_n$                                            | $\text{H}_2\text{O}$ | $1.70 \times 10^4$ | $2.67 \times 10^{-5}$  | S34 |
| $\{[\text{Zn}_2(\text{BIBP})_2(\text{HL}^{22})_2] \cdot 2\text{H}_2\text{O}\}_n$                                     | $\text{H}_2\text{O}$ | $1.20 \times 10^4$ | $4.16 \times 10^{-5}$  | S34 |
| $[\text{Zn}_2(\text{OH})(1,4\text{-ndc})_{1.5}(\text{Cz-3,6-bpy})] \cdot 2\text{H}_2\text{O}$                        | $\text{H}_2\text{O}$ | $9.08 \times 10^3$ | $1.10 \times 10^{-6}$  | S36 |
| $[\text{Zn}(4\text{-tkpvb})(\text{BB})_2]$                                                                           | $\text{H}_2\text{O}$ | 923                | $1.21 \times 10^{-8}$  | S37 |
| $\{[\text{Cd}_3(\text{HL}^{24})_2(\text{H}_2\text{O})_3] \cdot 3\text{H}_2\text{O} \cdot 2\text{CH}_3\text{CN}\}_n$  | $\text{H}_2\text{O}$ | $1.41 \times 10^4$ | $8.65 \times 10^{-5}$  | S40 |
| $[\text{Zn}(\text{tpbpc})_2] \cdot \text{solvent}$                                                                   | $\text{H}_2\text{O}$ | $1.65 \times 10^5$ | $4.66 \times 10^{-8}$  | S49 |
| $\{[\text{Cd}_{10}(\text{DDB})_4(\text{bpz})_8(\text{DMA})(\text{H}_2\text{O})_{8.2}] \cdot 2\text{H}_2\text{O}\}_n$ | $\text{H}_2\text{O}$ | $2.59 \times 10^4$ | $3.31 \times 10^{-7}$  | S51 |
| $[\text{Zn}(\text{IPA})(\text{L}^{29})]_n$                                                                           | $\text{H}_2\text{O}$ | $1.00 \times 10^3$ | $1.833 \times 10^{-5}$ | S52 |
| $[\text{Cd}(\text{IPA})(\text{L}^{29})]_n$                                                                           | $\text{H}_2\text{O}$ | $1.30 \times 10^3$ | $2.52 \times 10^{-6}$  | S52 |
| $\{[\text{Cd}_2\text{L}^{30}_2(\text{H}_2\text{O})_4] \cdot \text{H}_2\text{O}\}_n$                                  | $\text{H}_2\text{O}$ | $1.21 \times 10^4$ | $3.8 \times 10^{-6}$   | S53 |
| $\{[\text{Zn}_2\text{L}^{30}_2(\text{H}_2\text{O})_4] \cdot \text{H}_2\text{O}\}_n$                                  | $\text{H}_2\text{O}$ | $1.95 \times 10^4$ | $2.3 \times 10^{-6}$   | S53 |
| $[\text{Cd}(4\text{-tkpvb})(5\text{-tert-BIPA})]_n$                                                                  | $\text{H}_2\text{O}$ | $4.68 \times 10^4$ | $8 \times 10^{-8}$     | S54 |
| $\{[\text{Zn}_2(\text{TPOM})(\text{NH}_2\text{-bdc})_2] \cdot 4\text{H}_2\text{O}\}_n$                               | DMF                  | $4.45 \times 10^3$ | $4.8 \times 10^{-6}$   | S56 |

---

|                                                                                                                 |                      |                    |                       |     |
|-----------------------------------------------------------------------------------------------------------------|----------------------|--------------------|-----------------------|-----|
| $[\text{Zn}(\text{btz})]_n$                                                                                     | $\text{H}_2\text{O}$ | $3.19 \times 10^3$ | $1.0 \times 10^{-5}$  | S57 |
| $\{[\text{Zn}_2(\text{ttz})\text{H}_2\text{O}]_n\}$                                                             | $\text{H}_2\text{O}$ | $2.35 \times 10^3$ | $1.00 \times 10^{-5}$ | S57 |
| $[\text{Cd}_3(\text{cpota})_2(\text{phen})_3]_n \cdot 5\text{H}_2\text{O}$                                      | $\text{H}_2\text{O}$ | $6.9 \times 10^3$  | $4.18 \times 10^{-7}$ | S58 |
| $[\text{Zn}(\text{NH}_2\text{-bdc})(4,4'\text{-bipy})]_n$                                                       | $\text{H}_2\text{O}$ | $4.56 \times 10^3$ | $2.21 \times 10^{-6}$ | S59 |
| $\{[\text{Cd}_2(\text{HDDDB})(\text{bib})_{1.5}(\text{H}_2\text{O})] \cdot 2.5\text{H}_2\text{O}\}_n$           | $\text{H}_2\text{O}$ | $4.7 \times 10^3$  | -                     | S60 |
| $[\text{Cd}_2(\text{HDDDB})(\text{m-bimb})] \cdot \text{H}_2\text{O}\}_n$                                       | $\text{H}_2\text{O}$ | $2.5 \times 10^3$  | -                     | S60 |
| $\{[\text{Cd}_2(\text{DDB})(\text{p-bimb})] \cdot 2.5\text{H}_2\text{O} \cdot 0.5(\text{p-H}_2\text{bimb})\}_n$ | $\text{H}_2\text{O}$ | $6.0 \times 10^3$  | -                     | S60 |

Abbreviations:

$\text{L}^1 = 4,4'-(2,5\text{-Bis(methylthio)-1,4-phenylene})\text{-dipyridine}$ ;  $\text{H}_2\text{dcdps} = 4,4'\text{-sulfon-yl}dibenzoic\ acid$ ;  $\text{H}_2\text{bdc} = 1,4\text{-dicarboxybenzene}$ ;  $\text{H}_2\text{oba} = 4,4'\text{-oxy-bisbenzoic acid}$ ;  $\text{phen} = 1,10\text{-phenanthroline}$ ;  $\text{H}_2\text{L}^2 = 6\text{-methoxy-2,2'-sulfone-4,4'-dicarboxylic acid}$ ;  $2,2'\text{-bipy} = 2,2'\text{-bipyridine}$ ;  $\text{H}_4\text{L}^3 = 1,1'\text{-biphenyl-2,3,3',5'-tetracarboxylic acid}$ ;  $\text{H}_2\text{L}^4 = 9\text{H-carbazolyl-3,6-dicarboxylic acid}$ ;  $4,4'\text{-bipy} = 4,4'\text{-bipyridine}$ ;  $\text{bbibp} = 4,4'\text{-bis(benzoimidaz-1-yl)biphenyl}$ ;  $\text{H}_2\text{L}^5 = 4,4'\text{-(4,4'-bipyridine-2,6-diyl)dibenzoic acid}$ ;  $\text{L}^6 = 9,10\text{-bis(N-benzimidazolyl)-anthracene}$ ;  $\text{L}^7 = (9,10\text{-bis(N-benzimidazolyl)-anthracene}$ ;  $\text{H}_2\text{bdc} = \text{terephthalic acid}$ ;  $\text{H}_3\text{BTB} = 1,3,5\text{-tris(4-carboxyphenyl)benzene}$ ;  $\text{H}_3\text{btc} = 1,3,5\text{-benzenetricarboxylic acid}$ ;  $\text{H}_2\text{-Br-bdc} = \text{bromo-terephthalic acid}$ ;  $\text{L}^8 = 1,3,4\text{-trikisisoniacyl-2-deoxy-}\beta\text{-D-ribose}$ ;  $\text{H}_2\text{NH}_2\text{-bdc} = \text{amino-terephthalic acid}$ ;  $\text{TPHC} = [1,1':2',1''\text{-terphenyl-3,3'',4,4',4'',5'-hexacarboxylic acid}$ ;  $1,4\text{-H}_2\text{ndc} = 1,4\text{-naphthalenedicarboxylic acid}$ ;  $\text{dpb} = 1,4\text{-bis(pyrid-4-yl)benzene}$ ;  $\text{H}_25\text{-asba} = 2\text{-amino-5-sulfobenzoic acid}$ ;  $\text{bimb} = 1,4\text{-bis(1H-imidazol-1-yl)butane}$ ;  $\text{Htrz} = 1\text{H-1,2,3-triazole}$ ;  $\text{H}_2\text{HIP} = 5\text{-hydroxyisophthalic acid}$ ;  $\text{H}_2\text{hfipbb} = 4,4'\text{-(hexafluoroisopropylidene)bis(benzoic acid)}$ ;  $\text{L}^9 = 5,8\text{-di(1H-imidazol-1-yl)quinoxaline}$ ;  $\text{H}_5\text{L}^{10} = 2,5\text{-bis(3',5'-dicarboxylphenyl)-benzoic acid}$ ;  $\text{L}^{11} = 4,4'\text{-(2,5-bis(methylthio)-1,4-phenylene)dipyridine}$ ;  $\text{H}_2\text{BPDC} = 4,4'\text{-biphenyldicarboxylic acid}$ ;  $\text{H}_2\text{SDBA} = 4,4'\text{-sulfonyldibenzoic acid}$ ;  $\text{mtrb} = 1,3\text{-bis(1,2,4-triazole-4-ylmethyl)benzene}$ ;  $\text{H}_2\text{L}^{12} = 5\text{-(4-pyridylamino)isophthalic acid}$ ;  $\text{H}_2\text{DBTDC-O}_2 = \text{S,S-dioxodibenzothiophen-3,7-dicarboxylic acid}$ ;  $\text{HL}^{13} = 4\text{-(4-(2-chloroimidazo[1,2-a]pyridin-3-yl)-[2,30-bipyridin]-6-yl)benzoic acid}$ ;  $\text{H}_2\text{TBA} = 4\text{-(1H-tetrazol-5-yl)-benzoic acid}$ ;  $\text{Hcptpy} = 4\text{-(4-carboxyphenyl)-2,2':4',4''-terpyridine}$ ;  $\text{H}_4\text{L}^{14} = 1\text{-(3,5-dicarboxylatobenzyl)-3,5-pyrazole dicarboxylic acid}$ ;  $\text{HEDP} = 1\text{-hydroxyethylidene diphosphonate}$ ;  $\text{H}_5\text{L}^{15} = 2,4\text{-di(3',5'-dicarboxylphenyl)benzoic acid}$ ;  $5\text{-H}_2\text{AIP} = 5\text{-aminoisophthalic acid}$ ;  $\text{H}_2\text{ATA} = 2\text{-aminoterephthalic acid}$ ;  $\text{L}^{16} = 3\text{-pyridin-3-yl-N-[5-(3-pyridin-3-yl-acryloylamino)-naphthalen-1-yl]-acrylamide}$ ;  $\text{L}^{17} = (\text{E})\text{-N'-(pyridin-4-ylmethylene)isonicotinohydrazide}$ ;  $\text{H}_4\text{bptc} = 3,3',5,5'\text{-biphenyltetracarboxylic acid}$ ;  $\text{bpe} = (\text{E})\text{-1,2-di(pyridin-4-yl)ethene}$ ;  $\text{L}^{18} = 4,4'\text{-(1,2-phenylenebis(methylene))bis(oxy)dibenzoic acid}$ ;  $\text{L}^{19} = 5',5'''\text{-bis(4-carboxyphenyl)-[1,1':3',1'':4'',1''':3''',1''''-quinquephenyl]-4,4'''\text{-dicarboxylate}$ ;  $\text{L}^{20} = 4,4',4'',4'''\text{-(4,4'-(1,4-phenylene)bis(pyridine-6,4,2-triyl))-tetrabenzoate}$ ;  $\text{H}_2\text{L}^{21} = 2',3',5',6'\text{-tetramethyl-[1,1':4',1''-terphenyl]-4,4''-dicarboxylic acid}$ ;  $\text{BIMB} = 4,4\text{-bis(imidazol-1-ylmethyl)biphenyl}$ ;  $\text{BIBP} = 4,4\text{-bis(imidazol-1-yl)diphenyl}$ ;  $\text{H}_3\text{cpta} = 2\text{-(2-carboxyphenoxy)terephthalic acid}$ ;  $\text{H}_3\text{L}^{22} = 5\text{-(6-carboxypyridin-2-yl)benzene-1,3-dicarboxylic acid}$ ;  $\text{H}_2\text{DHT} = 2,5\text{-dihydroxyterephthalic acid}$ ;  $\text{BPP} = 1,3\text{-di(4-pyridyl)propane}$ ;  $\text{Cz-3,6-bpy} = 3,6\text{-bis(pyridin-4-yl)-9H-carbazole}$ ;  $4\text{-tkpvb} = 1,2,4,5\text{-}$

tetrakis((E)-2-(pyridin-4-yl)vinyl)benzene; HBB = 3-bromobenzoic acid; H<sub>2</sub>L<sup>23</sup> = 3-carboxy-1-(3'-carboxybenzyl)-2-oxidopyridinium; 1,4-bib = 1,4-bis(1H-imidazol-1-yl)benzene; H<sub>2</sub>TPA-Cl<sub>2</sub> = 2,5-dichloro-terephthalic acid; H<sub>4</sub>L<sup>24</sup> = 1-(3,5-dicarboxylatobenzyl)-3,5-pyrazole dicarboxylic acid; H<sub>4</sub>bpta = 2,2',4,4'-biphenyltetracarboxylic acid; bpea = 1,2-bis(4-pyridyl)ethane; 3-bpah = N,N'-bis(3-pyridinecarboxamide)-1,2-cyclohexane; H<sub>3</sub>cip = 5-(3-carboxybenzylamino)-isophthalic acid; H<sub>3</sub>dttz = 4,5-di(1H-tetrazol-5-yl)-2H-1,2,3-triazole; Hdpa = 4,4'-dipyridylamine; bpa = 9,10-bis(4-pyridyl)anthracene; bztpy = 1,2,4,5-tetrakis(4-pyridyl)benzene; H<sub>2</sub>TBTA = tetrabromoterephthalic acid; L<sup>25</sup> = 1,2-bis(benzimidazole-1-ylmethyl)benzene; L<sup>26</sup> = 1,3-bis(benzimidazole-1-ylmethyl)-benzene; L<sup>27</sup> = 1,4-bis(benzimidazole-1-ylmethyl)-benzene; Htpbpc = 4'-[4,2';6',4'']-terpyrindin-4'-biphenyl-4-carboxylic acid; H<sub>2</sub>TBIP = 5-tert-butylisophthalic acid; L<sup>28</sup> = 1,3-bis(5,6-dimethylbenzimidazol-1-yl)propane; bpz = 2-(1H-pyrazol-3-yl)pyridine; H<sub>5</sub>DDB = 3,5-di(2',4'-dicarboxylphenyl)benzoic acid; H<sub>2</sub>IPA = isophthalic acid; L<sup>29</sup> = 3-pyridylcarboxaldehyde nicotinoylhydrazone; H<sub>2</sub>L<sup>30</sup> = 5-(1H-1,2,4-triazol-1-yl)isophthalic acid; 4-tkpvb = 1,2,4,5-tetrakis(4-pyridylvinyl)benzene; 5-tert-H<sub>2</sub>-BIPA = 5-tert-butylisophthalic acid; BBI = 1,1'-(1,4-butanediyl)bis(imidazole); H<sub>2</sub>L<sup>31</sup> = benzo-(1,2;4,5)-bis(thiophene-2'-carboxylic acid; TPOM = tetrakis(4-pyridyloxymethylene)methane; H<sub>2</sub>btz = 1,5-bis(5-tetrazolo)-3-oxapentane; H<sub>3</sub>ttz = 1,2,3-tris-[2-(5-tetrazolo)-ethoxy]propane; H<sub>3</sub>cpota = 2-(4-carboxyphenoxy)terephthalic acid; bib = 1,4-bis(imidazol-1-yl)benzene; H<sub>5</sub>DDB = 3,5-di(2',4'-dicarboxylphenyl)benzoic acid; m-bimb = 1,3-bis(imidazol-1-ylmethyl)benzene; p-bimb = 1,4-bis(imidazol-1-ylmethyl)benzene; dpa = 9,10-di(4-pyridyl)anthracene; H<sub>2</sub>cda = cyclohexane-1,4-dicarboxylic acid.

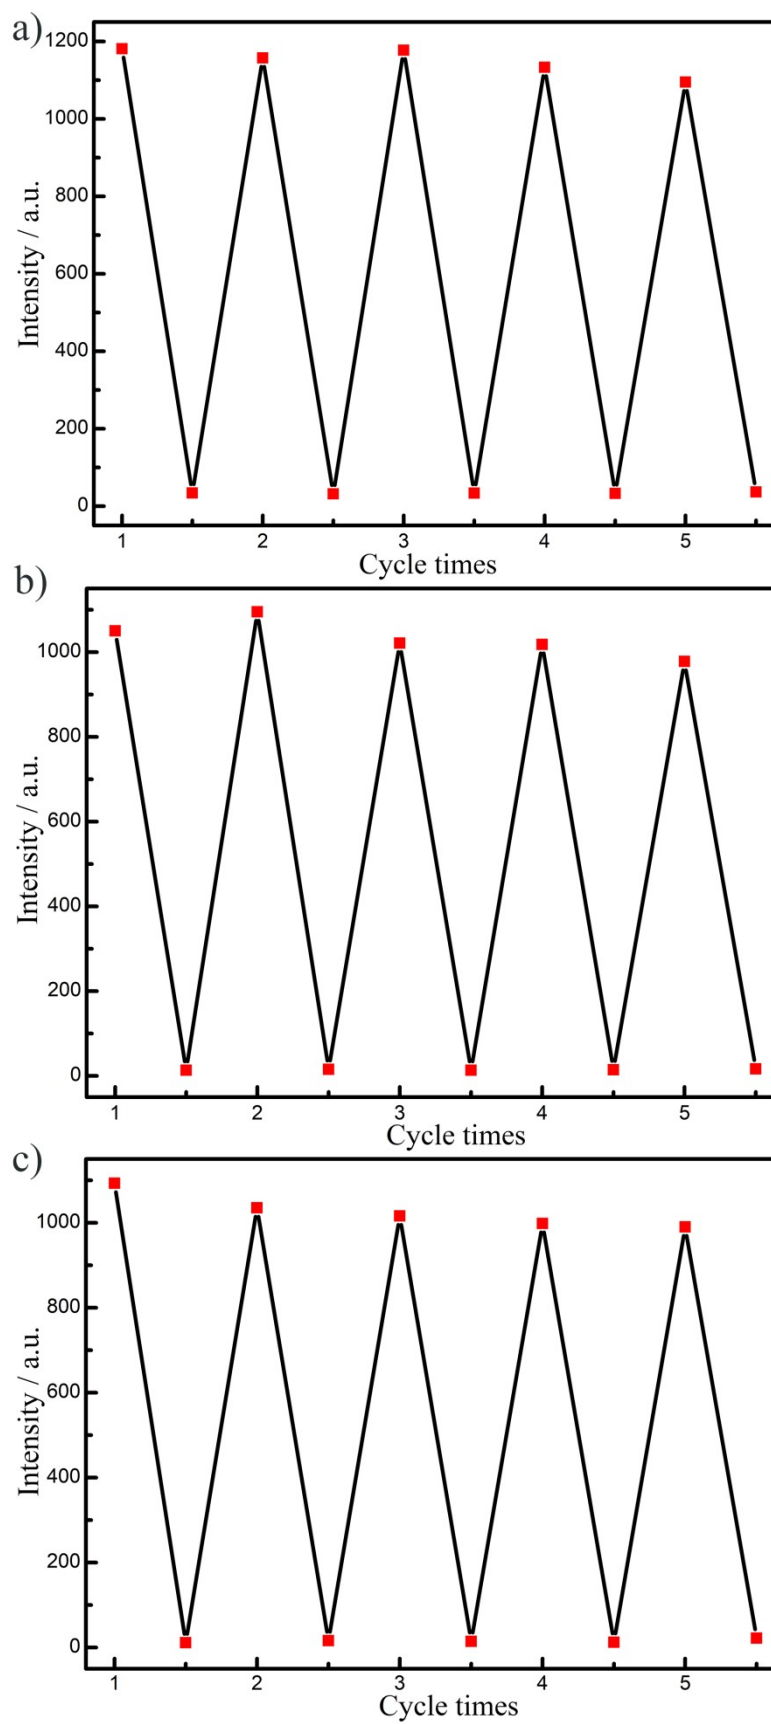

**Fig. S7** The recyclable luminescence experiments of **1** towards sensing  $\text{Fe}^{3+}$  (a),  $\text{Cr}_2\text{O}_7^{2-}$  (b), and  $\text{CrO}_4^{2-}$  (c), respectively.

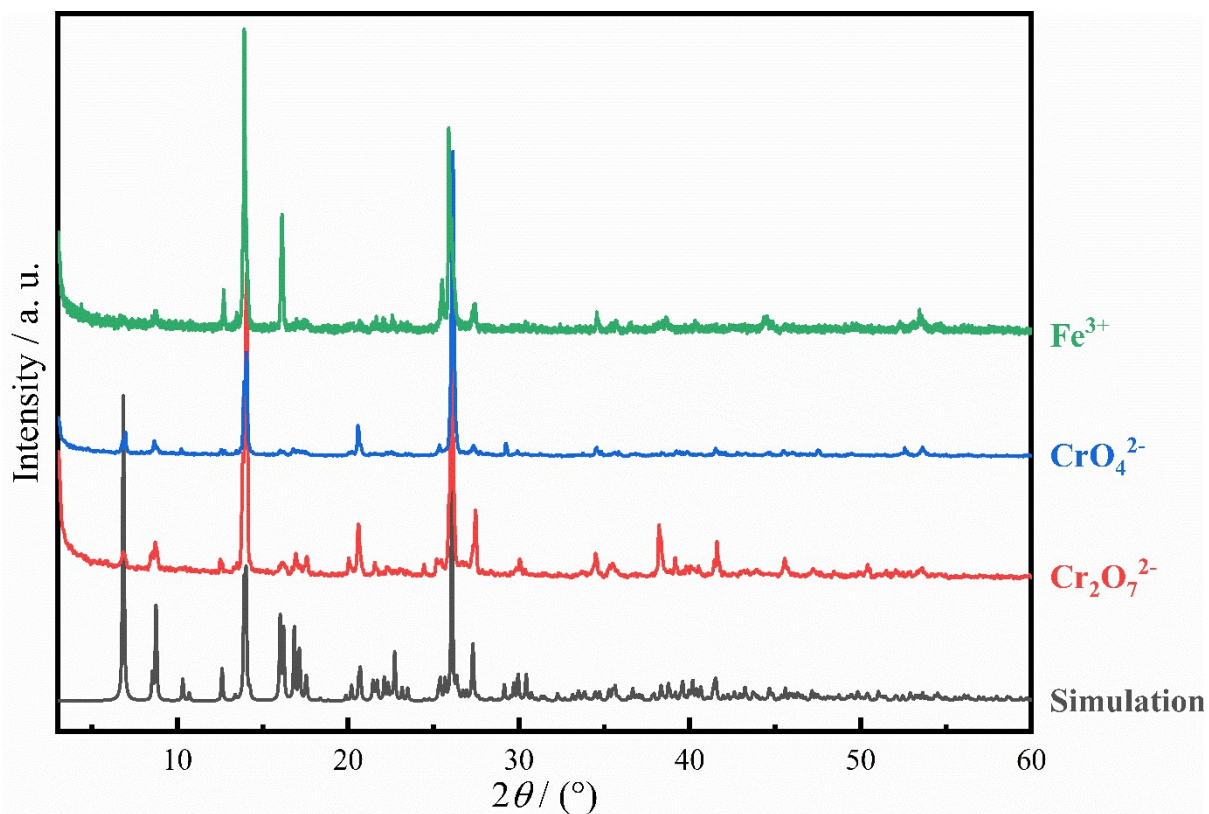

**Fig. S8** The PXR D spectra for the simulation and sample of **1** immersed into the aqueous of  $\text{Fe}^{3+}$ ,  $\text{Cr}_2\text{O}_7^{2-}$  and  $\text{CrO}_4^{2-}$  for one week.

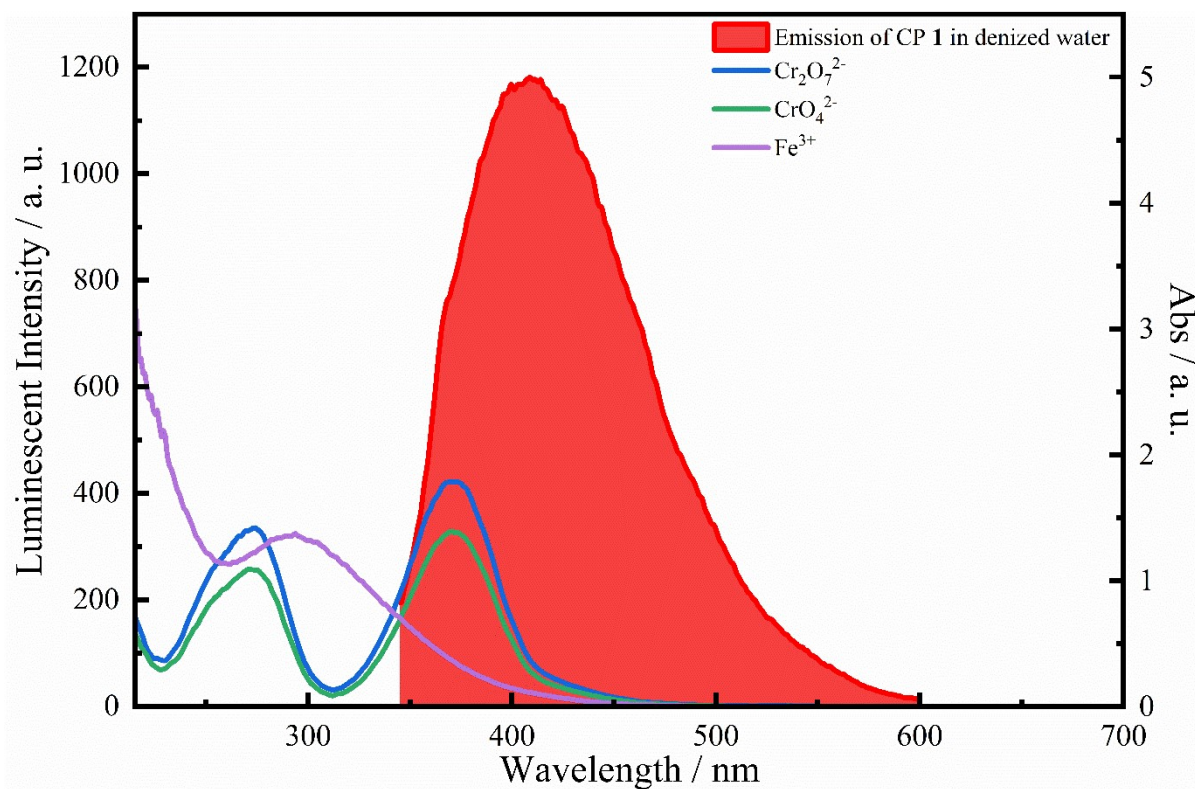

**Fig. S9** The emission spectra of **1** in deionized water and the UV-vis spectra of the aqueous of  $\text{Fe}^{3+}$ ,  $\text{Cr}_2\text{O}_7^{2-}$  and  $\text{CrO}_4^{2-}$ .

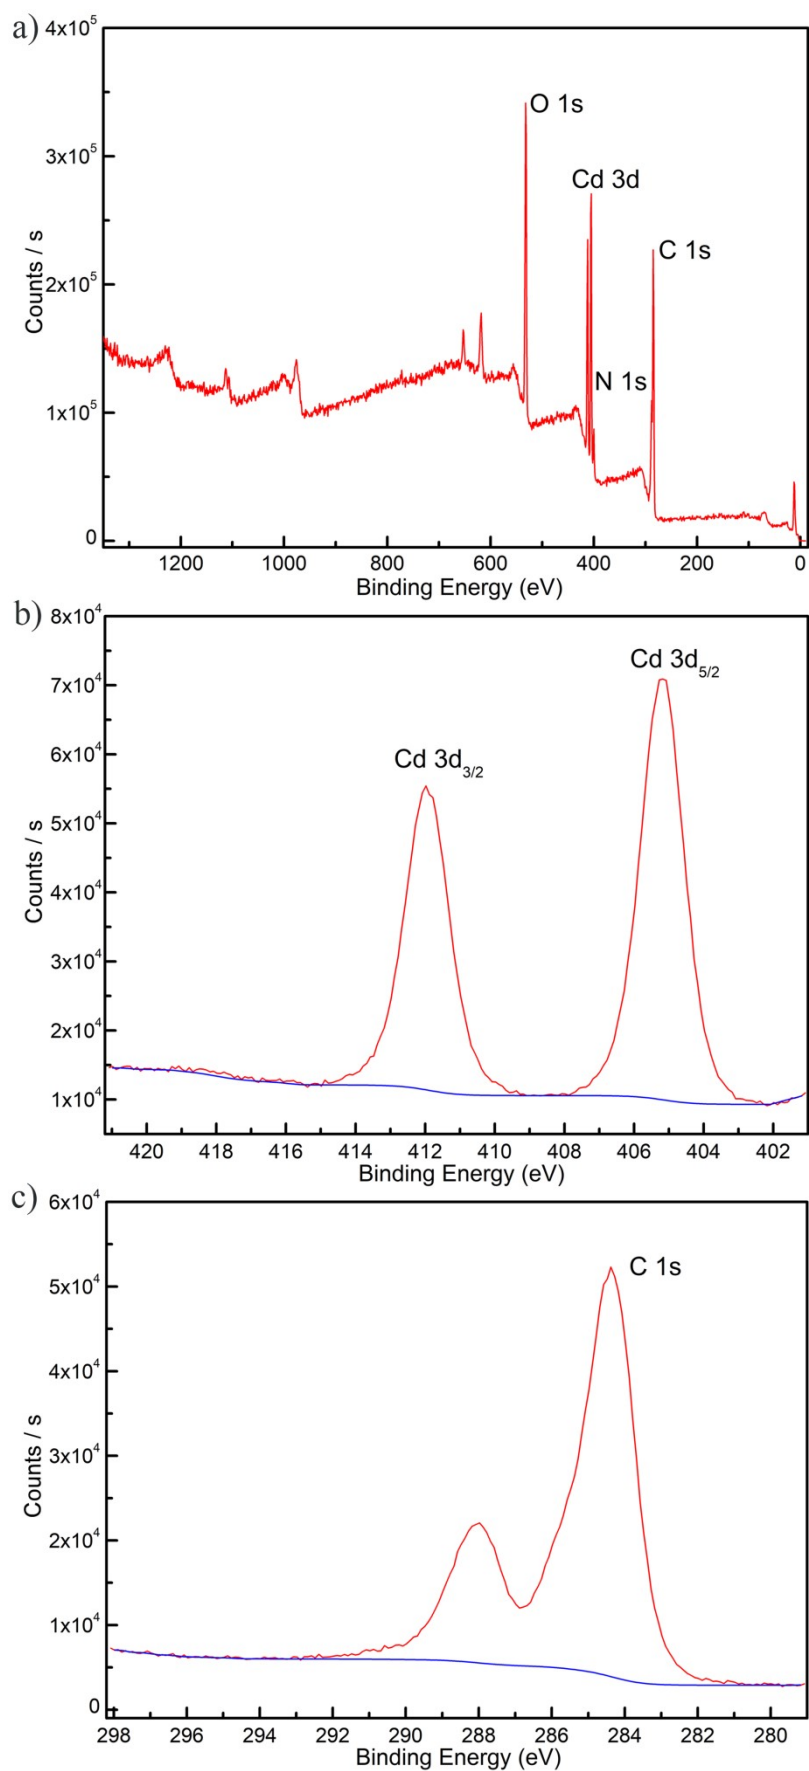

**Fig. S10** The XPS spectrum of **1** (a), XPS spectra of **1** for Cd 3d (b) and C 1s (c).

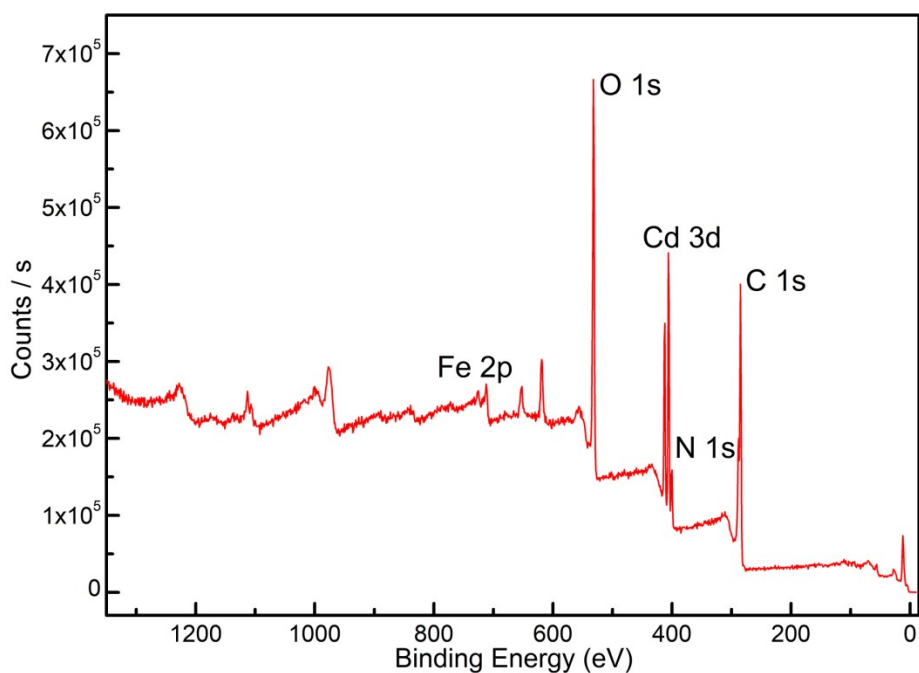

**Fig. S11** The XPS spectrum of **1** after detection of Fe<sup>3+</sup> ion.

## Reference

- [S1] F.-Y. Ge, G.-H. Sun, L. Meng, S.-S. Ren, H.-G. Zheng, Four New Luminescent Metal–Organic Frameworks as Multifunctional Sensors for Detecting Fe<sup>3+</sup>, Cr<sub>2</sub>O<sub>7</sub><sup>2-</sup> and Nitromethane, *Cryst. Growth Des.* 20(2020) 1898-1904.
- [S2] Q.-Q. Tu, L.-L. Ren, Y.-Y. Cui, A.-L. Cheng, E.-Q. Gao, Assembly of four new cobalt coordination polymers modulated by N-coligands: sensitive and selective sensing of nitroaromatics, Fe<sup>3+</sup> and Cr<sub>2</sub>O<sub>7</sub><sup>2-</sup> in water, *CrystEngComm* 22(2020) 1789-1801.
- [S3] Y. Wu, Y. Zhong, W. Kang, Y. Liu, T. Yang, M. Zhou, L. Zhou, Two new luminescent Cd(II)-based coordination polymers by regulating the asymmetrical tetracarboxylate and auxiliary ligands displaying high sensitivity for Fe<sup>3+</sup> and CrO<sub>4</sub><sup>2-</sup>, *CrystEngComm* 23(2021) 3460-3466.
- [S4] J.-L. Du, X.-Y. Zhang, C.-P. Li, J.-P. Gao, J.-X. Hou, X. Jing, Y.-J. Mu, L.-J. Li, A bi-functional luminescent Zn(II)-MOF for detection of nitroaromatic explosives and Fe<sup>3+</sup> ions, *Sens. Actuators, B* 257(2018) 207-213.
- [S5] C. Fan, B. Zhu, X. Zhang, C. Bi, D. Zhang, Z. Zong, Y. Fan, Highly Stable Acid-Induced Emission-Enhancing Cd-MOFs: Synthesis, Characterization, and Detection of Glutamic Acid in Water and Fe Ions in Acid, *Inorg. Chem.* 60(2021) 6339-6348.
- [S6] M. Fan, B. Sun, X. Li, Q. Pan, J. Sun, P. Ma, Z. Su, Highly Fluorescent Cadmium Based Metal–Organic Frameworks for Rapid Detection of Antibiotic Residues, Fe<sup>3+</sup> and Cr<sub>2</sub>O<sub>7</sub><sup>2-</sup> Ions, *Inorg. Chem.* 60(2021) 9148-9156.

- [S7] M.Y. Fan, H.H. Yu, P. Fu, Z.M. Su, X. Li, X.L. Hu, F.W. Gao, Q.Q. Pan, Luminescent Cd(II) metal-organic frameworks with anthracene nitrogen-containing organic ligands as novel multifunctional chemosensors for the detection of picric acid, pesticides, and ferric ions, *Dyes Pigm.* 185(2021) 108834.
- [S8] T.-S. He, Y.-L. Lan, Z.-Y. Li, L.-N. Zhu, X.-Z. Li, Chiral Coordination Polymers from a New 2-Deoxy-d-ribose Derivative Linker: Syntheses, Structures, and Fe<sup>3+</sup> Fluorescent Probe Functions, *Cryst. Growth Des.* 21(2021) 2233-2242.
- [S9] C. Gogoi, S. Biswas, A new quinoline based luminescent Zr(IV) metal-organic framework for the ultrasensitive recognition of 4-nitrophenol and Fe(III) ions, *Dalton Trans.* 47(2018) 14696-14705.
- [S10] C. Yu, X. Sun, L. Zou, G. Li, L. Zhang, Y. Liu, A Pillar-Layered Zn-LMOF with Uncoordinated Carboxylic Acid Sites: High Performance for Luminescence Sensing Fe<sup>3+</sup> and TNP, *Inorg. Chem.* 58(2019) 4026-4032.
- [S11] Z.-F. Wu, L.-K. Gong, X.-Y. Huang, A Mg-CP with in Situ Encapsulated Photochromic Guest as Sensitive Fluorescence Sensor for Fe<sup>3+</sup>/Cr<sup>3+</sup> Ions and Nitro-Explosives, *Inorg. Chem.* 56(2017) 7397-7403.
- [S12] C.-H. Chen, X.-S. Wang, L. Li, Y.-B. Huang, R. Cao, Highly selective sensing of Fe<sup>3+</sup> by an anionic metal-organic framework containing uncoordinated nitrogen and carboxylate oxygen sites, *Dalton Trans.* 47(2018) 3452-3458.
- [S13] Y.-J. Yang, M.-J. Wang, K.-L. Zhang, A novel photoluminescent Cd(II)-organic framework exhibiting rapid and efficient multi-responsive fluorescence sensing for trace amounts of Fe<sup>3+</sup> ions and some NACs, especially for 4-nitroaniline and 2-methyl-4-nitroaniline, *J. Mater. Chem. C* 4(2016) 11404-11418.
- [S14] B.-L. Hou, D. Tian, J. Liu, L.-Z. Dong, S.-L. Li, D.-S. Li, Y.-Q. Lan, A Water-Stable Metal-Organic Framework for Highly Sensitive and Selective Sensing of Fe<sup>3+</sup> Ion, *Inorg. Chem.* 55(2016) 10580-10586.
- [S15] X. Zhang, Z.-J. Wang, S.-G. Chen, Z.-Z. Shi, J.-X. Chen, H.-G. Zheng, Cd-Based metal-organic frameworks from solvothermal reactions involving in situ aldimine condensation and the highly sensitive detection of Fe<sup>3+</sup> ions, *Dalton Trans.* 46(2017) 2332-2338.
- [S16] J. Wang, X.-R. Wu, J.-Q. Liu, B.-H. Li, A. Singh, A. Kumar, S.R. Batten, An uncommon (5,5)-connected 3D metal organic material for selective and sensitive sensing of nitroaromatics and ferric ion: experimental studies and theoretical analysis, *CrystEngComm* 19(2017) 3519-3525.
- [S17] S. Chen, Z. Shi, L. Qin, H. Jia, H. Zheng, Two New Luminescent Cd(II)-Metal-Organic Frameworks as Bifunctional Chemosensors for Detection of Cations Fe<sup>3+</sup>, Anions CrO<sub>4</sub><sup>2-</sup>, and Cr<sub>2</sub>O<sub>7</sub><sup>2-</sup> in Aqueous Solution, *Cryst. Growth Des.* 17(2017) 67-72.
- [S18] Y.-Q. Zhang, V.A. Blatov, T.-R. Zheng, C.-H. Yang, L.-L. Qian, K. Li, B.-L. Li, B. Wu, A luminescent zinc(II) coordination polymer with unusual (3,4,4)-coordinated self-catenated 3D network for selective detection



- of nitroaromatics and ferric and chromate ions: a versatile luminescent sensor, *Dalton Trans.* 47(2018) 6189-6198.
- [S19] A.-M. Zhou, H. Wei, W. Gao, J.-P. Liu, X.-M. Zhang, Two 2D multiresponsive luminescence coordination polymers for selective sensing of  $\text{Fe}^{3+}$ ,  $\text{Cr}^{\text{VI}}$  anions and TNP in aqueous medium, *CrystEngComm* 21(2019) 5185-5194.
- [S20] H. He, Q.-Q. Zhu, C.-P. Li, M. Du, Design of a Highly-Stable Pillar-Layer Zinc(II) Porous Framework for Rapid, Reversible, and Multi-Responsive Luminescent Sensor in Water, *Cryst. Growth Des.* 19(2019) 694-703.
- [S21] B. Li, Q.-Q. Yan, G.-P. Yong, A new porous coordination polymer reveals selective sensing of  $\text{Fe}^{3+}$ ,  $\text{Cr}_2\text{O}_7^{2-}$ ,  $\text{CrO}_4^{2-}$ ,  $\text{MnO}_4^-$  and nitrobenzene, and stimuli-responsive luminescence color conversions, *J. Mater. Chem. C* 8(2020) 11786-11795.
- [S22] X. Zhang, X. Zhuang, N. Zhang, C. Ge, X. Luo, J. Li, J. Wu, Q. Yang, R. Liu, A luminescent sensor based on a Zn(II) coordination polymer for selective and sensitive detection of NACs and  $\text{Fe}^{3+}$  ions, *CrystEngComm* 21(2019) 1948-1955.
- [S23] H. Chen, P. Fan, X. Tu, H. Min, X. Yu, X. Li, J.-L. Zeng, S. Zhang, P. Cheng, A Bifunctional Luminescent Metal–Organic Framework for the Sensing of Paraquat and  $\text{Fe}^{3+}$  Ions in Water, *Chem. Asian. J.* 14(2019) 3611-3619.
- [S24] W.-N. Liu, W.-Q. Tong, L.-L. Ma, Y. Wang, J.-M. Wang, L. Hou, Y.-Y. Wang, Five new 3D transition MOFs based on 1-(3,5-dicarboxylatobenzyl)-3,5-pyrazole dicarboxylic acid displaying unique luminescence sensing towards  $\text{Fe}^{3+}$  and magnetic properties, *Dalton Trans.* 48(2019) 7786-7793.
- [S25] H.-H. Liu, J. Pan, Z.-Z. Xue, S.-D. Han, J.-H. Li, G.-M. Wang, Multiple Detection Characteristics of Two Zinc Phosphonates: Syntheses, Crystal Structures, and Luminescent Properties, *Cryst. Growth Des.* 19(2019) 5326-5333.
- [S26] Y.-T. Yan, W.-Y. Zhang, F. Zhang, F. Cao, R.-F. Yang, Y.-Y. Wang, L. Hou, Four new metal–organic frameworks based on diverse secondary building units: sensing and magnetic properties, *Dalton Trans.* 47(2018) 1682-1692.
- [S27] D. Das, K. Biradha, Luminescent Coordination Polymers of Naphthalene Based Diamide with Rigid and Flexible Dicarboxylates: Sensing of Nitro Explosives,  $\text{Fe}(\text{III})$  Ion, and Dyes, *Cryst. Growth Des.* 18(2018) 3683-3692.
- [S28] B. Parmar, Y. Rachuri, K.K. Bisht, E. Suresh, Mixed-Ligand LMOF Fluorosensors for Detection of  $\text{Cr}(\text{VI})$  Oxyanions and  $\text{Fe}^{3+}/\text{Pd}^{2+}$  Cations in Aqueous Media, *Inorg. Chem.* 56(2017) 10939-10949.
- [S29] Y. Lin, X. Zhang, W. Chen, W. Shi, P. Cheng, Three Cadmium Coordination Polymers with Carboxylate and Pyridine Mixed Ligands: Luminescent Sensors for  $\text{Fe}^{\text{III}}$  and  $\text{Cr}^{\text{VI}}$  Ions in an Aqueous Medium, *Inorg. Chem.*

56(2017) 11768-11778.

[S30] F.-l. Hu, Y.-X. Shi, H.-H. Chen, J.-P. Lang, A Zn(II) coordination polymer and its photocycloaddition product: syntheses, structures, selective luminescence sensing of iron(III) ions and selective absorption of dyes, Dalton Trans. 44(2015) 18795-18803.

[S31] B. Wang, Q. Yang, C. Guo, Y. Sun, L.-H. Xie, J.-R. Li, Stable Zr(IV)-Based Metal–Organic Frameworks with Predesigned Functionalized Ligands for Highly Selective Detection of Fe(III) Ions in Water, ACS Appl. Mater. Interfaces 9(2017) 10286-10295.

[S32] S.-F. Tang, X. Hou, A Highly Stable Dual Functional Zinc Phosphite Carboxylate as Luminescent Sensor of Fe<sup>3+</sup> and Cr<sub>2</sub>O<sub>7</sub><sup>2-</sup>, Cryst. Growth Des. 19(2019) 45-48.

[S33] J.-Z. Gu, X.-X. Liang, Y.-H. Cui, J. Wu, Z.-F. Shi, A.M. Kirillov, Introducing 2-(2-carboxyphenoxy)terephthalic acid as a new versatile building block for design of diverse coordination polymers: synthesis, structural features, luminescence sensing, and magnetism, CrystEngComm 19(2017) 2570-2588.

[S34] Y.-S. Xue, C. Zhang, J.Q. Lv, N.-N. Chen, J. Wang, X.-R. Chen, L. Fan, Luminescence sensing and photocatalytic activities of four Zn(II)/Co(II) coordination polymers based on a pyridinephenyl bifunctional ligand, CrystEngComm 23(2021) 1497-1506.

[S35] S.-T. Wang, X. Zheng, S.-H. Zhang, G. Li, Y. Xiao, A study of GUPT-2, a water-stable zinc-based metal–organic framework as a highly selective and sensitive fluorescent sensor in the detection of Al<sup>3+</sup> and Fe<sup>3+</sup> ions, CrystEngComm 23(2021) 4059-4068.

[S36] P.-M. Chuang, J.-Y. Wu, A highly stable Zn coordination polymer exhibiting pH-dependent fluorescence and as a visually ratiometric and on–off fluorescent sensor, CrystEngComm 23(2021) 5226-5240.

[S37] Z.-Y. Yang, C. Cao, X. Sang, Y.-X. Hong, H. Yu, C.-Y. Ni, J.-P. Lang, Assembly of a Zn(II) coordination polymer of tetrapyrrolyl tetraene ligands for selective sensing of CrO<sub>4</sub><sup>2-</sup> and Fe<sup>3+</sup> in water via luminescence quenching and enhancement, CrystEngComm 24(2022) 1564-1572.

[S38] Y.-C. He, S. Wu, J. Zhang, W.-H. Qin, J. Liu, F.-H. Zhao, L. Liu, Z. Jing, Syntheses, structures, and luminescence properties of five new coordination polymers based on 3-carboxy-1-(3'-carboxybenzyl)-2-oxidopyridinium and neutral ligands, CrystEngComm 24(2022) 6715-6723.

[S39] J.-W. Cui, S.-X. Hou, Y.-H. Li, G.-H. Cui, A multifunctional Ni(II) coordination polymer: synthesis, crystal structure and applications as a luminescent sensor, electrochemical probe, and photocatalyst, Dalton Trans. 46(2017) 16911-16924.

[S40] W.-Q. Tong, W.-N. Liu, J.-G. Cheng, P.-F. Zhang, G.-p. Li, L. Hou, Y.-Y. Wang, A new stable luminescent Cd(II) metal–organic framework with fluorescent sensing and selective dye adsorption properties, Dalton Trans.

47(2018) 9466-9473.

[S41] Y. Zhang, X. Yang, H.-C. Zhou, Direct synthesis of functionalized PCN-333 via linker design for Fe<sup>3+</sup> detection in aqueous media, Dalton Trans. 47(2018) 11806-11811.

[S42] Y. Liu, Y. Wang, X.-S. Zhang, Y.-S. Sheng, W.-Z. Li, A.-A. Yang, J. Luan, H.-Z. Liu, Z.-G. Wang, A novel 3D Zn-coordination polymer based on a multiresponsive fluorescent sensor demonstrating outstanding sensitivities and selectivities for the efficient detection of multiple analytes, Dalton Trans. 50(2021) 15176-15186.

[S43] W.-H. Huang, J. Ren, Y.-H. Yang, X.-M. Li, Q. Wang, N. Jiang, J.-Q. Yu, F. Wang, J. Zhang, Water-Stable Metal–Organic Frameworks with Selective Sensing on Fe<sup>3+</sup> and Nitroaromatic Explosives, and Stimuli-Responsive Luminescence on Lanthanide Encapsulation, Inorg. Chem. 58(2019) 1481-1491.

[S44] Y.e. Yu, Y. Wang, H. Yan, J. Lu, H. Liu, Y. Li, S. Wang, D. Li, J. Dou, L. Yang, Z. Zhou, Multiresponsive Luminescent Sensitivities of a 3D Cd-CP with Visual Turn-on and Ratiometric Sensing toward Al<sup>3+</sup> and Cr<sup>3+</sup> as Well as Turn-off Sensing toward Fe<sup>3+</sup>, Inorg. Chem. 59(2020) 3828-3837.

[S45] Y.-W. Li, J. Li, X.-Y. Wan, D.-F. Sheng, H. Yan, S.-S. Zhang, H.-Y. Ma, S.-N. Wang, D.-C. Li, Z.-Y. Gao, J.-M. Dou, D. Sun, Nanocage-Based N-Rich Metal–Organic Framework for Luminescence Sensing toward Fe<sup>3+</sup> and Cu<sup>2+</sup> Ions, Inorg. Chem. 60(2021) 671-681.

[S46] C.-C. Chen, Y. Cai, L.-F. Wang, Y.-D. Wu, H.-J. Yin, J.-R. Zhou, C.-L. Ni, W. Liu, Three Silver(I) Coordination Polymers Based on Pyridyl Ligands and Auxiliary Carboxylic Ligands: Luminescence and Efficient Sensing Properties, Inorg. Chem. 60(2021) 5463-5473.

[S47] A.-L. Li, Y.-H. Qu, L. Fu, C. Han, G.-H. Cui, Multidimensional luminescent cobalt(II)-coordination polymers as sensors with extremely high sensitivity and selectivity for detection of acetylacetone, benzaldehyde and Cr<sub>2</sub>O<sub>7</sub><sup>2-</sup>, CrystEngComm 22(2020) 2656-2666.

[S48] J. Liu, S. Liu, J. Ma, Y. Diao, M. Li, J. He, S. Chen, Q. Zhang, A Stable 2D Zr(IV)-Based Metal–Organic Framework (USTS-7) for Selective Sensing of Cr<sub>2</sub>O<sub>7</sub><sup>2-</sup> in Aqueous Solution, Inorg. Chem. 59(2020) 17884-17888.

[S49] J. Xiao, J. Liu, X. Gao, G. Ji, D. Wang, Z. Liu, A multi-chemosensor based on Zn-MOF: Ratio-dependent color transition detection of Hg (II) and highly sensitive sensor of Cr (VI), Sens. Actuators, B 269(2018) 164-172.

[S50] Q.-Q. Xiao, G.-Y. Dong, Y.-H. Li, G.-H. Cui, Cobalt(II)-Based 3D Coordination Polymer with Unusual 4,4,4-Connected Topology as a Dual-Responsive Fluorescent Chemosensor for Acetylacetone and Cr<sub>2</sub>O<sub>7</sub><sup>2-</sup>, Inorg. Chem. 58(2019) 15696-15699.

[S51] L. Fan, D. Zhao, B. Li, X. Chen, F. Wang, Y. Deng, Y. Niu, X. Zhang, An exceptionally stable luminescent cadmium(II) metal–organic framework as a dual-functional chemosensor for detecting Cr(VI) anions and nitro-containing antibiotics in aqueous media, CrystEngComm 23(2021) 1218-1225.

- [S52] B. Parmar, Y. Rachuri, K.K. Bisht, R. Laiya, E. Suresh, Mechanochemical and Conventional Synthesis of Zn(II)/Cd(II) Luminescent Coordination Polymers: Dual Sensing Probe for Selective Detection of Chromate Anions and TNP in Aqueous Phase, *Inorg. Chem.* 56(2017) 2627-2638.
- [S53] C.-X. Wang, Y.-P. Xia, Z.-Q. Yao, J. Xu, Z. Chang, X.-H. Bu, Two luminescent coordination polymers as highly selective and sensitive chemosensors for Cr<sup>VI</sup>-anions in aqueous medium, *Dalton Trans.* 48(2019) 387-394.
- [S54] W.-J. Gong, R. Yao, H.-X. Li, Z.-G. Ren, J.-G. Zhang, J.-P. Lang, Luminescent cadmium(II) coordination polymers of 1,2,4,5-tetrakis(4-pyridylvinyl)benzene used as efficient multi-responsive sensors for toxic metal ions in water, *Dalton Trans.* 46(2017) 16861-16871.
- [S55] Y. Zhao, X. Xu, L. Qiu, X. Kang, L. Wen, B. Zhang, Metal–Organic Frameworks Constructed from a New Thiophene-Functionalized Dicarboxylate: Luminescence Sensing and Pesticide Removal, *ACS Appl. Mater. Interfaces* 9(2017) 15164-15175.
- [S56] R. Lv, J. Wang, Y. Zhang, H. Li, L. Yang, S. Liao, W. Gu, X. Liu, An amino-decorated dual-functional metal–organic framework for highly selective sensing of Cr(III) and Cr(VI) ions and detection of nitroaromatic explosives, *J. Mater. Chem. A* 4(2016) 15494-15500.
- [S57] C.-S. Cao, H.-C. Hu, H. Xu, W.-Z. Qiao, B. Zhao, Two solvent-stable MOFs as a recyclable luminescent probe for detecting dichromate or chromate anions, *CrystEngComm* 18(2016) 4445-4451.
- [S58] S. Li, L. Lu, M. Zhu, C. Yuan, S. Feng, A bifunctional chemosensor for detection of volatile ketone or hexavalent chromate anions in aqueous solution based on a Cd(II) metal–organic framework, *Sens. Actuators, B* 258(2018) 970-980.
- [S59] T. Wiwasuku, J. Boonmak, K. Siritwong, V. Ervithayasuporn, S. Youngme, Highly sensitive and selective fluorescent sensor based on a multi-responsive ultrastable amino-functionalized Zn(II)-MOF for hazardous chemicals, *Sens. Actuators, B* 284(2019) 403-413.
- [S60] L. Fan, Y. Zhang, J. Liang, X. Wang, H. Lv, J. Wang, L. Zhao, X. Zhang, Structural diversity, magnetic properties, and luminescence sensing of five 3D coordination polymers derived from designed 3,5-di(2',4'-dicarboxylphenyl)benzoic acid, *CrystEngComm* 20(2018) 4752-4762.
- [S61] Y.-K. Xu, M.-M. Meng, J.-M. Xi, L.-F. Wang, R. Zhu, X.-G. Liu, R. Zhang, W. Dong, Z.-Z. Lu, H.-G. Zheng, W. Huang, Mixed matrix membranes containing fluorescent coordination polymers for detecting Cr<sub>2</sub>O<sub>7</sub><sup>2-</sup> with high sensitivity, stability and recyclability, *Dalton Trans.* 50(2021) 7944-7948.
